# Supplementary material for: Do tigers hunt during the day? Diel activity of the Asian tiger mosquito, Aedes albopictus (Diptera: Culicidae), in urban and suburban habitats of North America
Source: PLoS Negl Trop Dis. 2021 Aug 20;15(8):e0009438. doi: 10.1371/journal.pntd.0009438 (PMC8409682; doi:10.1371/journal.pntd.0009438)
Supplement: S1 Data — (XLSX) [file pntd.0009438.s001.xlsx]

## Sheet: Rotating Bottle Collector New J
Date	Site	Trap type	RT times	Time	Trap status 0/1)	Ae.albopictus F	Ae.albopictus M	Total
2013-07-03	CJY	BGS+RT1	1-4PM	2	0	73	21	94
2013-07-03	CJY	BGS+RT1	1-4PM	2	0	5	0	5
2013-07-03	NCA	BGS+RT1	1-4PM	2	0	1	0	1
2013-07-03	NCA	BGS+RT1	1-4PM	2	0	0	0	0
2013-07-03	CJY	BGS+RT8	10AM-1PM	2	0	0	0	0
2013-07-03	CJY	BGS+RT8	10AM-1PM	2	0	0	0	0
2013-07-03	NCA	BGS+RT8	10AM-1PM	2	0	0	0	0
2013-07-03	NCA	BGS+RT8	10AM-1PM	2	0	0	0	0
2013-07-03	CJY	BGS+RT4	10PM-1AM	4	0	6	2	8
2013-07-03	CJY	BGS+RT4	10PM-1AM	4	0	4	2	6
2013-07-03	NCA	BGS+RT4	10PM-1AM	4	0	0	0	0
2013-07-03	NCA	BGS+RT4	10PM-1AM	4	0	6	0	6
2013-07-03	CJY	BGS+RT5	1-4AM	4	0	7	3	10
2013-07-03	CJY	BGS+RT5	1-4AM	4	0	0	0	0
2013-07-03	NCA	BGS+RT5	1-4AM	4	0	0	0	0
2013-07-03	NCA	BGS+RT5	1-4AM	4	0	0	0	0
2013-07-03	CJY	BGS+RT6	4-7AM	1	0	0	1	1
2013-07-03	CJY	BGS+RT6	4-7AM	1	0	2	0	2
2013-07-03	NCA	BGS+RT6	4-7AM	1	0	0	0	0
2013-07-03	NCA	BGS+RT6	4-7AM	1	0	0	0	0
2013-07-03	CJY	BGS+RT2	4-7PM	3	0	62	20	82
2013-07-03	CJY	BGS+RT2	4-7PM	3	0	3	1	4
2013-07-03	NCA	BGS+RT2	4-7PM	3	0	0	0	0
2013-07-03	NCA	BGS+RT2	4-7PM	3	0	0	0	0
2013-07-03	CJY	BGS+RT7	7-10AM	1	0	1	0	1
2013-07-03	CJY	BGS+RT7	7-10AM	1	0	0	1	1
2013-07-03	NCA	BGS+RT7	7-10AM	1	0	0	0	0
2013-07-03	NCA	BGS+RT7	7-10AM	1	0	0	0	0
2013-07-03	CJY	BGS+RT3	7-10PM	3	0	26	22	48
2013-07-03	CJY	BGS+RT3	7-10PM	3	0	7	2	9
2013-07-03	NCA	BGS+RT3	7-10PM	3	0	1	0	1
2013-07-03	NCA	BGS+RT3	7-10PM	3	0	5	0	5
2013-07-11	CJY	BGS+RT1	1-4PM	2	0	11	3	14
2013-07-11	CJY	BGS+RT1	1-4PM	2	0	46	11	57
2013-07-11	NCA	BGS+RT1	1-4PM	2	0	15	0	15
2013-07-11	NCA	BGS+RT1	1-4PM	2	0	14	0	14
2013-07-11	CJY	BGS+RT8	10AM-1PM		0	1	0	1
2013-07-11	CJY	BGS+RT8	10AM-1PM		0	4	1	5
2013-07-11	NCA	BGS+RT8	10AM-1PM		0	0	0	0
2013-07-11	NCA	BGS+RT8	10AM-1PM		0	41	9	50
2013-07-11	CJY	BGS+RT4	10PM-1AM		0	0	0	0
2013-07-11	CJY	BGS+RT4	10PM-1AM		0	7	2	9
2013-07-11	NCA	BGS+RT4	10PM-1AM		0	3	0	3
2013-07-11	NCA	BGS+RT4	10PM-1AM		0	0	0	0
2013-07-11	CJY	BGS+RT5	1-4AM		0	0	0	0
2013-07-11	CJY	BGS+RT5	1-4AM		0	3	1	4
2013-07-11	NCA	BGS+RT5	1-4AM		0	0	0	0
2013-07-11	NCA	BGS+RT5	1-4AM		0	0	0	0
2013-07-11	CJY	BGS+RT6	4-7AM		0	0	0	0
2013-07-11	CJY	BGS+RT6	4-7AM		0	3	4	7
2013-07-11	NCA	BGS+RT6	4-7AM		0	0	0	0
2013-07-11	NCA	BGS+RT6	4-7AM		0	0	0	0
2013-07-11	CJY	BGS+RT2	4-7PM		0	0	0	0
2013-07-11	CJY	BGS+RT2	4-7PM		0	1	0	1
2013-07-11	NCA	BGS+RT2	4-7PM		0	4	0	4
2013-07-11	NCA	BGS+RT2	4-7PM		0	2	0	2
2013-07-11	CJY	BGS+RT7	7-10AM		0	0	0	0
2013-07-11	CJY	BGS+RT7	7-10AM		0	1	0	1
2013-07-11	NCA	BGS+RT7	7-10AM		0	1	0	1
2013-07-11	NCA	BGS+RT7	7-10AM		0	1	0	1
2013-07-11	CJY	BGS+RT3	7-10PM		0	1	0	1
2013-07-11	CJY	BGS+RT3	7-10PM		0	0	0	0
2013-07-11	NCA	BGS+RT3	7-10PM		0	15	16	31
2013-07-11	NCA	BGS+RT3	7-10PM		0	8	2	10
2013-07-19	CJY	BGS+RT1	1-4PM	2	0	69	11	80
2013-07-19	CJY	BGS+RT1	1-4PM	2	0	5	1	6
2013-07-19	NCA	BGS+RT1	1-4PM	2	0	3	1	4
2013-07-19	NCA	BGS+RT1	1-4PM	2	0	1	0	1
2013-07-19	CJY	BGS+RT8	10AM-1PM		0	0	1	1
2013-07-19	CJY	BGS+RT8	10AM-1PM		0	0	0	0
2013-07-19	NCA	BGS+RT8	10AM-1PM		0	3	1	4
2013-07-19	NCA	BGS+RT8	10AM-1PM		0	7	4	11
2013-07-19	CJY	BGS+RT4	10PM-1AM		0	0	1	1
2013-07-19	CJY	BGS+RT4	10PM-1AM		0	7	2	9
2013-07-19	NCA	BGS+RT4	10PM-1AM		0	2	0	2
2013-07-19	NCA	BGS+RT4	10PM-1AM		0	1	1	2
2013-07-19	CJY	BGS+RT5	1-4AM		0	26	0	26
2013-07-19	CJY	BGS+RT5	1-4AM		0	6	4	10
2013-07-19	NCA	BGS+RT5	1-4AM		0	0	0	0
2013-07-19	NCA	BGS+RT5	1-4AM		0	5	0	5
2013-07-19	CJY	BGS+RT6	4-7AM		0	7	2	9
2013-07-19	CJY	BGS+RT6	4-7AM		0	0	6	6
2013-07-19	NCA	BGS+RT6	4-7AM		0	0	1	1
2013-07-19	NCA	BGS+RT6	4-7AM		0	0	2	2
2013-07-19	CJY	BGS+RT2	4-7PM		0	7	2	9
2013-07-19	CJY	BGS+RT2	4-7PM		0	0	0	0
2013-07-19	NCA	BGS+RT2	4-7PM		0	2	0	2
2013-07-19	NCA	BGS+RT2	4-7PM		0	6	3	9
2013-07-19	CJY	BGS+RT7	7-10AM		0	0	1	1
2013-07-19	CJY	BGS+RT7	7-10AM		0	11	3	14
2013-07-19	NCA	BGS+RT7	7-10AM		0	0	0	0
2013-07-19	NCA	BGS+RT7	7-10AM		0	0	0	0
2013-07-19	CJY	BGS+RT3	7-10PM		0	0	0	0
2013-07-19	CJY	BGS+RT3	7-10PM		0	0	0	0
2013-07-19	NCA	BGS+RT3	7-10PM		0	5	0	5
2013-07-19	NCA	BGS+RT3	7-10PM		0	2	4	6
2013-07-25	CJY	BGS+RT1	1-4PM	2	0	0	0	0
2013-07-25	CJY	BGS+RT1	1-4PM	2	0	3	0	3
2013-07-25	NCA	BGS+RT1	1-4PM	2	0	7	3	10
2013-07-25	NCA	BGS+RT1	1-4PM	2	0	17	0	17
2013-07-25	CJY	BGS+RT8	10AM-1PM		0	97	11	108
2013-07-25	CJY	BGS+RT8	10AM-1PM		0	0	0	0
2013-07-25	NCA	BGS+RT8	10AM-1PM		0	38	4	42
2013-07-25	NCA	BGS+RT8	10AM-1PM		0	0	0	0
2013-07-25	CJY	BGS+RT4	10PM-1AM		0	4	3	7
2013-07-25	CJY	BGS+RT4	10PM-1AM		0	7	2	9
2013-07-25	NCA	BGS+RT4	10PM-1AM		0	3	2	5
2013-07-25	NCA	BGS+RT4	10PM-1AM		0	3	1	4
2013-07-25	CJY	BGS+RT5	1-4AM		0	0	1	1
2013-07-25	CJY	BGS+RT5	1-4AM		0	0	0	0
2013-07-25	NCA	BGS+RT5	1-4AM		0	8	2	10
2013-07-25	NCA	BGS+RT5	1-4AM		0	0	0	0
2013-07-25	CJY	BGS+RT6	4-7AM		0	0	0	0
2013-07-25	CJY	BGS+RT6	4-7AM		0	0	3	3
2013-07-25	NCA	BGS+RT6	4-7AM		0	0	0	0
2013-07-25	NCA	BGS+RT6	4-7AM		0	0	1	1
2013-07-25	CJY	BGS+RT2	4-7PM		0	16	21	37
2013-07-25	CJY	BGS+RT2	4-7PM		0	27	5	32
2013-07-25	NCA	BGS+RT2	4-7PM		0	4	0	4
2013-07-25	NCA	BGS+RT2	4-7PM		0	8	3	11
2013-07-25	CJY	BGS+RT7	7-10AM		0	0	0	0
2013-07-25	CJY	BGS+RT7	7-10AM		0	0	1	1
2013-07-25	NCA	BGS+RT7	7-10AM		0	0	0	0
2013-07-25	CJY	BGS+RT3	7-10PM		0	9	2	11
2013-07-25	CJY	BGS+RT3	7-10PM		0	30	7	37
2013-07-25	NCA	BGS+RT3	7-10PM		0	8	5	13
2013-07-25	NCA	BGS+RT3	7-10PM		0	11	3	14
2013-07-31	CJY	BGS+RT1	1-4PM	2	0	4	0	4
2013-07-31	CJY	BGS+RT1	1-4PM	2	0	11	2	13
2013-07-31	NCA	BGS+RT1	1-4PM	2	0	12	3	15
2013-07-31	CJY	BGS+RT8	10AM-1PM		0	76	3	79
2013-07-31	CJY	BGS+RT8	10AM-1PM		0	98	37	135
2013-07-31	NCA	BGS+RT8	10AM-1PM		0	19	3	22
2013-07-31	CJY	BGS+RT4	10PM-1AM		0	3	0	3
2013-07-31	CJY	BGS+RT4	10PM-1AM		0	8	1	9
2013-07-31	NCA	BGS+RT4	10PM-1AM		0	0	0	0
2013-07-31	CJY	BGS+RT5	1-4AM		0	0	0	0
2013-07-31	CJY	BGS+RT5	1-4AM		0	4	1	5
2013-07-31	NCA	BGS+RT5	1-4AM		0	0	0	0
2013-07-31	CJY	BGS+RT6	4-7AM		0	1	0	1
2013-07-31	CJY	BGS+RT6	4-7AM		0	2	0	2
2013-07-31	NCA	BGS+RT6	4-7AM		0	0	0	0
2013-07-31	CJY	BGS+RT2	4-7PM		0	17	5	22
2013-07-31	CJY	BGS+RT2	4-7PM		0	48	12	60
2013-07-31	NCA	BGS+RT2	4-7PM		0	4	1	5
2013-07-31	CJY	BGS+RT7	7-10AM		0	1	0	1
2013-07-31	CJY	BGS+RT7	7-10AM		0	9	6	15
2013-07-31	NCA	BGS+RT7	7-10AM		0	0	0	0
2013-07-31	CJY	BGS+RT3	7-10PM		0	70	35	105
2013-07-31	NCA	BGS+RT3	7-10PM		0	1	0	1
2013-08-08	CJY	BGS+RT1	1-4PM	2	0	10	2	12
2013-08-08	CJY	BGS+RT1	1-4PM	2	0	18	4	22
2013-08-08	NCA	BGS+RT1	1-4PM	2	0	8	0	8
2013-08-08	NCA	BGS+RT1	1-4PM	2	0	5	2	7
2013-08-08	CJY	BGS+RT8	10AM-1PM		0	26	5	31
2013-08-08	CJY	BGS+RT8	10AM-1PM		0	27	28	55
2013-08-08	NCA	BGS+RT8	10AM-1PM		0	7	3	10
2013-08-08	NCA	BGS+RT8	10AM-1PM		0	10	4	14
2013-08-08	CJY	BGS+RT4	10PM-1AM		0	13	1	14
2013-08-08	CJY	BGS+RT4	10PM-1AM		0	13	5	18
2013-08-08	NCA	BGS+RT4	10PM-1AM		0	0	0	0
2013-08-08	NCA	BGS+RT4	10PM-1AM		0	0	0	0
2013-08-08	CJY	BGS+RT5	1-4AM		0	1	6	7
2013-08-08	CJY	BGS+RT5	1-4AM		0	1	15	16
2013-08-08	NCA	BGS+RT5	1-4AM		0	1	0	1
2013-08-08	NCA	BGS+RT5	1-4AM		0	0	0	0
2013-08-08	CJY	BGS+RT6	4-7AM		0	1	0	1
2013-08-08	CJY	BGS+RT6	4-7AM		0	16	6	22
2013-08-08	NCA	BGS+RT6	4-7AM		0	2	0	2
2013-08-08	NCA	BGS+RT6	4-7AM		0	0	0	0
2013-08-08	CJY	BGS+RT2	4-7PM		0	13	8	21
2013-08-08	CJY	BGS+RT2	4-7PM		0	23	11	34
2013-08-08	NCA	BGS+RT2	4-7PM		0	11	13	24
2013-08-08	NCA	BGS+RT2	4-7PM		0	1	0	1
2013-08-08	CJY	BGS+RT7	7-10AM		0	2	0	2
2013-08-08	CJY	BGS+RT7	7-10AM		0	10	5	15
2013-08-08	NCA	BGS+RT7	7-10AM		0	0	1	1
2013-08-08	NCA	BGS+RT7	7-10AM		0	0	0	0
2013-08-08	CJY	BGS+RT3	7-10PM		0	11	6	17
2013-08-08	CJY	BGS+RT3	7-10PM		0	7	6	13
2013-08-08	NCA	BGS+RT3	7-10PM		0	0	0	0
2013-08-08	NCA	BGS+RT3	7-10PM		0	0	0	0
2013-08-15	CJY	BGS+RT1	1-4PM	2	0	23	2	25
2013-08-15	CJY	BGS+RT1	1-4PM	2	0	25	2	27
2013-08-15	NCA	BGS+RT1	1-4PM	2	0	0	0	0
2013-08-15	NCA	BGS+RT1	1-4PM	2	1	N/A	N/A	0
2013-08-15	CJY	BGS+RT8	10AM-1PM		0	59	2	61
2013-08-15	CJY	BGS+RT8	10AM-1PM		0	1	0	1
2013-08-15	NCA	BGS+RT8	10AM-1PM		0	0	0	0
2013-08-15	NCA	BGS+RT8	10AM-1PM		1	N/A	N/A	0
2013-08-15	CJY	BGS+RT4	10PM-1AM		0	0	1	1
2013-08-15	CJY	BGS+RT4	10PM-1AM		0	4	2	6
2013-08-15	NCA	BGS+RT4	10PM-1AM		0	0	0	0
2013-08-15	NCA	BGS+RT4	10PM-1AM		1	N/A	N/A	0
2013-08-15	CJY	BGS+RT5	1-4AM		0	3	0	3
2013-08-15	CJY	BGS+RT5	1-4AM		0	2	0	2
2013-08-15	NCA	BGS+RT5	1-4AM		0	0	0	0
2013-08-15	NCA	BGS+RT5	1-4AM		1	N/A	N/A	0
2013-08-15	CJY	BGS+RT6	4-7AM		0	0	0	0
2013-08-15	CJY	BGS+RT6	4-7AM		0	0	0	0
2013-08-15	NCA	BGS+RT6	4-7AM		0	0	0	0
2013-08-15	NCA	BGS+RT6	4-7AM		1	N/A	N/A	0
2013-08-15	CJY	BGS+RT2	4-7PM		0	30	6	36
2013-08-15	CJY	BGS+RT2	4-7PM		0	8	5	13
2013-08-15	NCA	BGS+RT2	4-7PM		0	7	0	7
2013-08-15	NCA	BGS+RT2	4-7PM		1	N/A	N/A	0
2013-08-15	CJY	BGS+RT7	7-10AM		0	2	0	2
2013-08-15	CJY	BGS+RT7	7-10AM		0	1	0	1
2013-08-15	NCA	BGS+RT7	7-10AM		0	0	0	0
2013-08-15	NCA	BGS+RT7	7-10AM		1	N/A	N/A	0
2013-08-15	CJY	BGS+RT3	7-10PM		0	42	21	63
2013-08-15	CJY	BGS+RT3	7-10PM		0	28	26	54
2013-08-15	NCA	BGS+RT3	7-10PM		0	5	0	5
2013-08-15	NCA	BGS+RT3	7-10PM		1	N/A	N/A	0
2013-08-21	CJY	BGS+RT1	1-4PM	2	0	14	11	25
2013-08-21	CJY	BGS+RT1	1-4PM	2	0	5	1	6
2013-08-21	NCA	BGS+RT1	1-4PM	2	0	10	2	12
2013-08-21	NCA	BGS+RT1	1-4PM	2	0	30	4	34
2013-08-21	CJY	BGS+RT8	10AM-1PM		0	79	41	120
2013-08-21	CJY	BGS+RT8	10AM-1PM		0	33	5	38
2013-08-21	NCA	BGS+RT8	10AM-1PM		0	12	8	20
2013-08-21	NCA	BGS+RT8	10AM-1PM		0	0	0	0
2013-08-21	CJY	BGS+RT4	10PM-1AM		0	10	2	12
2013-08-21	CJY	BGS+RT4	10PM-1AM		0	13	8	21
2013-08-21	NCA	BGS+RT4	10PM-1AM		0	4	0	4
2013-08-21	NCA	BGS+RT4	10PM-1AM		0	0	0	0
2013-08-21	CJY	BGS+RT5	1-4AM		0	8	2	10
2013-08-21	CJY	BGS+RT5	1-4AM		0	6	0	6
2013-08-21	NCA	BGS+RT5	1-4AM		0	3	5	8
2013-08-21	NCA	BGS+RT5	1-4AM		0	1	0	1
2013-08-21	CJY	BGS+RT6	4-7AM		0	0	0	0
2013-08-21	CJY	BGS+RT6	4-7AM		0	8	2	10
2013-08-21	NCA	BGS+RT6	4-7AM		0	0	0	0
2013-08-21	NCA	BGS+RT6	4-7AM		0	13	4	17
2013-08-21	CJY	BGS+RT2	4-7PM		0	48	13	61
2013-08-21	CJY	BGS+RT2	4-7PM		0	2	0	2
2013-08-21	NCA	BGS+RT2	4-7PM		0	9	1	10
2013-08-21	NCA	BGS+RT2	4-7PM		0	0	0	0
2013-08-21	CJY	BGS+RT7	7-10AM		0	41	19	60
2013-08-21	CJY	BGS+RT7	7-10AM		0	0	0	0
2013-08-21	NCA	BGS+RT7	7-10AM		0	0	0	0
2013-08-21	NCA	BGS+RT7	7-10AM		0	0	0	0
2013-08-21	CJY	BGS+RT3	7-10PM		0	2	0	2
2013-08-21	CJY	BGS+RT3	7-10PM		0	84	22	106
2013-08-21	NCA	BGS+RT3	7-10PM		0	3	0	3
2013-08-21	NCA	BGS+RT3	7-10PM		0	2	0	2
2013-08-29	CJY	BGS+RT1	1-4PM	2	0	20	8	28
2013-08-29	CJY	BGS+RT1	1-4PM	2	0	7	0	7
2013-08-29	NCA	BGS+RT1	1-4PM	2	0	5	1	6
2013-08-29	NCA	BGS+RT1	1-4PM	2	0	1	1	2
2013-08-29	CJY	BGS+RT8	10AM-1PM		0	73	9	82
2013-08-29	CJY	BGS+RT8	10AM-1PM		0	12	1	13
2013-08-29	NCA	BGS+RT8	10AM-1PM		0	9	12	21
2013-08-29	NCA	BGS+RT8	10AM-1PM		0	4	7	11
2013-08-29	CJY	BGS+RT4	10PM-1AM		0	14	2	16
2013-08-29	CJY	BGS+RT4	10PM-1AM		0	2	2	4
2013-08-29	NCA	BGS+RT4	10PM-1AM		0	2	0	2
2013-08-29	NCA	BGS+RT4	10PM-1AM		0	0	0	0
2013-08-29	CJY	BGS+RT5	1-4AM		0	13	2	15
2013-08-29	CJY	BGS+RT5	1-4AM		0	1	0	1
2013-08-29	NCA	BGS+RT5	1-4AM		0	0	0	0
2013-08-29	NCA	BGS+RT5	1-4AM		0	0	0	0
2013-08-29	CJY	BGS+RT6	4-7AM		0	9	7	16
2013-08-29	CJY	BGS+RT6	4-7AM		0	1	0	1
2013-08-29	NCA	BGS+RT6	4-7AM		0	2	0	2
2013-08-29	NCA	BGS+RT6	4-7AM		0	0	0	0
2013-08-29	CJY	BGS+RT2	4-7PM		0	40	15	55
2013-08-29	CJY	BGS+RT2	4-7PM		0	26	1	27
2013-08-29	NCA	BGS+RT2	4-7PM		0	9	1	10
2013-08-29	NCA	BGS+RT2	4-7PM		0	4	0	4
2013-08-29	CJY	BGS+RT7	7-10AM		0	19	2	21
2013-08-29	CJY	BGS+RT7	7-10AM		0	0	0	0
2013-08-29	NCA	BGS+RT7	7-10AM		0	2	0	2
2013-08-29	NCA	BGS+RT7	7-10AM		0	1	0	1
2013-08-29	CJY	BGS+RT3	7-10PM		0	0	0	0
2013-08-29	CJY	BGS+RT3	7-10PM		0	29	6	35
2013-08-29	NCA	BGS+RT3	7-10PM		0	2	0	2
2013-08-29	NCA	BGS+RT3	7-10PM		0	0	0	0
2013-09-05	CJY	BGS+RT1	1-4PM	2	1	N/A	N/A	0
2013-09-05	CJY	BGS+RT1	1-4PM	2	0	11	2	13
2013-09-05	NCA	BGS+RT1	1-4PM	2	0	3	0	3
2013-09-05	NCA	BGS+RT1	1-4PM	2	0	8	1	9
2013-09-05	CJY	BGS+RT8	10AM-1PM		1	N/A	N/A	0
2013-09-05	CJY	BGS+RT8	10AM-1PM		0	87	22	109
2013-09-05	NCA	BGS+RT8	10AM-1PM		0	7	14	21
2013-09-05	NCA	BGS+RT8	10AM-1PM		0	7	5	12
2013-09-05	CJY	BGS+RT4	10PM-1AM		1	N/A	N/A	0
2013-09-05	CJY	BGS+RT4	10PM-1AM		0	6	3	9
2013-09-05	NCA	BGS+RT4	10PM-1AM		0	0	0	0
2013-09-05	NCA	BGS+RT4	10PM-1AM		0	3	1	4
2013-09-05	CJY	BGS+RT5	1-4AM		1	N/A	N/A	0
2013-09-05	CJY	BGS+RT5	1-4AM		0	1	0	1
2013-09-05	NCA	BGS+RT5	1-4AM		0	0	0	0
2013-09-05	NCA	BGS+RT5	1-4AM		0	0	0	0
2013-09-05	CJY	BGS+RT6	4-7AM		1	N/A	N/A	0
2013-09-05	CJY	BGS+RT6	4-7AM		0	3	0	3
2013-09-05	NCA	BGS+RT6	4-7AM		0	0	0	0
2013-09-05	NCA	BGS+RT6	4-7AM		0	0	0	0
2013-09-05	CJY	BGS+RT2	4-7PM		1	N/A	N/A	0
2013-09-05	CJY	BGS+RT2	4-7PM		0	61	9	70
2013-09-05	NCA	BGS+RT2	4-7PM		0	3	0	3
2013-09-05	NCA	BGS+RT2	4-7PM		0	12	2	14
2013-09-05	CJY	BGS+RT7	7-10AM		1	N/A	N/A	0
2013-09-05	CJY	BGS+RT7	7-10AM		0	0	0	0
2013-09-05	NCA	BGS+RT7	7-10AM		0	0	0	0
2013-09-05	NCA	BGS+RT7	7-10AM		0	0	0	0
2013-09-05	CJY	BGS+RT3	7-10PM		1	N/A	N/A	0
2013-09-05	CJY	BGS+RT3	7-10PM		0	0	0	0
2013-09-05	NCA	BGS+RT3	7-10PM		0	1	0	1
2013-09-05	NCA	BGS+RT3	7-10PM		0	6	1	7
2013-09-11	CJY	BGS+RT1	1-4PM	2	0	22	8	30
2013-09-11	CJY	BGS+RT1	1-4PM	2	0	11	5	16
2013-09-11	NCA	BGS+RT1	1-4PM	2	0	1	2	3
2013-09-11	NCA	BGS+RT1	1-4PM	2	0	3	3	6
2013-09-11	CJY	BGS+RT8	10AM-1PM		0	39	21	60
2013-09-11	CJY	BGS+RT8	10AM-1PM		0	49	13	62
2013-09-11	NCA	BGS+RT8	10AM-1PM		0	9	7	16
2013-09-11	NCA	BGS+RT8	10AM-1PM		0	4	12	16
2013-09-11	CJY	BGS+RT4	10PM-1AM		0	5	2	7
2013-09-11	CJY	BGS+RT4	10PM-1AM		0	1	3	4
2013-09-11	NCA	BGS+RT4	10PM-1AM		1	N/A	N/A	0
2013-09-11	NCA	BGS+RT4	10PM-1AM		0	0	0	0
2013-09-11	CJY	BGS+RT5	1-4AM		0	3	3	6
2013-09-11	CJY	BGS+RT5	1-4AM		0	3	1	4
2013-09-11	NCA	BGS+RT5	1-4AM		0	2	0	2
2013-09-11	NCA	BGS+RT5	1-4AM		0	2	0	2
2013-09-11	CJY	BGS+RT6	4-7AM		0	8	13	21
2013-09-11	CJY	BGS+RT6	4-7AM		0	1	1	2
2013-09-11	NCA	BGS+RT6	4-7AM		0	0	1	1
2013-09-11	NCA	BGS+RT6	4-7AM		0	0	2	2
2013-09-11	CJY	BGS+RT2	4-7PM		0	73	12	85
2013-09-11	CJY	BGS+RT2	4-7PM		0	14	11	25
2013-09-11	NCA	BGS+RT2	4-7PM		0	6	6	12
2013-09-11	NCA	BGS+RT2	4-7PM		0	14	8	22
2013-09-11	CJY	BGS+RT7	7-10AM		0	7	5	12
2013-09-11	CJY	BGS+RT7	7-10AM		0	0	1	1
2013-09-11	NCA	BGS+RT7	7-10AM		1	N/A	N/A	0
2013-09-11	NCA	BGS+RT7	7-10AM		0	0	0	0
2013-09-11	CJY	BGS+RT3	7-10PM		0	33	7	40
2013-09-11	CJY	BGS+RT3	7-10PM		0	33	10	43
2013-09-11	NCA	BGS+RT3	7-10PM		0	4	1	5
2013-09-11	NCA	BGS+RT3	7-10PM		0	2	0	2
2013-09-19	CJY	BGS+RT1	1-4PM	2	0	0	0	0
2013-09-19	CJY	BGS+RT1	1-4PM	2	0	35	4	39
2013-09-19	NCA	BGS+RT1	1-4PM	2	0	11	1	12
2013-09-19	NCA	BGS+RT1	1-4PM	2	0	3	1	4
2013-09-19	CJY	BGS+RT8	10AM-1PM		0	0	0	0
2013-09-19	CJY	BGS+RT8	10AM-1PM		0	57	1	58
2013-09-19	NCA	BGS+RT8	10AM-1PM		0	18	2	20
2013-09-19	NCA	BGS+RT8	10AM-1PM		0	8	1	9
2013-09-19	CJY	BGS+RT4	10PM-1AM		0	0	0	0
2013-09-19	CJY	BGS+RT4	10PM-1AM		0	0	0	0
2013-09-19	NCA	BGS+RT4	10PM-1AM		1	0	0	0
2013-09-19	NCA	BGS+RT4	10PM-1AM		0	0	0	0
2013-09-19	CJY	BGS+RT5	1-4AM		0	0	0	0
2013-09-19	CJY	BGS+RT5	1-4AM		0	0	0	0
2013-09-19	NCA	BGS+RT5	1-4AM		0	0	0	0
2013-09-19	NCA	BGS+RT5	1-4AM		0	0	0	0
2013-09-19	CJY	BGS+RT6	4-7AM		0	0	0	0
2013-09-19	CJY	BGS+RT6	4-7AM		0	0	0	0
2013-09-19	NCA	BGS+RT6	4-7AM		0	0	0	0
2013-09-19	NCA	BGS+RT6	4-7AM		0	0	0	0
2013-09-19	CJY	BGS+RT2	4-7PM		0	0	0	0
2013-09-19	CJY	BGS+RT2	4-7PM		0	45	9	54
2013-09-19	NCA	BGS+RT2	4-7PM		0	11	3	14
2013-09-19	NCA	BGS+RT2	4-7PM		0	7	1	8
2013-09-19	CJY	BGS+RT7	7-10AM		0	0	0	0
2013-09-19	CJY	BGS+RT7	7-10AM		0	0	0	0
2013-09-19	NCA	BGS+RT7	7-10AM		1	0	0	0
2013-09-19	NCA	BGS+RT7	7-10AM		0	0	0	0
2013-09-19	CJY	BGS+RT3	7-10PM		0	0	0	0
2013-09-19	CJY	BGS+RT3	7-10PM		0	1	0	1
2013-09-19	NCA	BGS+RT3	7-10PM		0	0	0	0
2013-09-19	NCA	BGS+RT3	7-10PM		0	0	0	0
2013-09-26	CJY	BGS+RT1	1-4PM	2	0	4	1	5
2013-09-26	CJY	BGS+RT1	1-4PM	2	0	11	1	12
2013-09-26	NCA	BGS+RT1	1-4PM	2	0	2	1	3
2013-09-26	NCA	BGS+RT1	1-4PM	2	0	6	2	8
2013-09-26	CJY	BGS+RT8	10AM-1PM		0	31	1	32
2013-09-26	CJY	BGS+RT8	10AM-1PM		0	11	3	14
2013-09-26	NCA	BGS+RT8	10AM-1PM		0	14	3	17
2013-09-26	NCA	BGS+RT8	10AM-1PM		0	2	1	3
2013-09-26	CJY	BGS+RT4	10PM-1AM		0	0	0	0
2013-09-26	CJY	BGS+RT4	10PM-1AM		0	0	0	0
2013-09-26	NCA	BGS+RT4	10PM-1AM		1	0	0	0
2013-09-26	NCA	BGS+RT4	10PM-1AM		0	0	0	0
2013-09-26	CJY	BGS+RT5	1-4AM		0	0	0	0
2013-09-26	CJY	BGS+RT5	1-4AM		0	0	0	0
2013-09-26	NCA	BGS+RT5	1-4AM		0	0	0	0
2013-09-26	NCA	BGS+RT5	1-4AM		0	0	0	0
2013-09-26	CJY	BGS+RT6	4-7AM		0	0	0	0
2013-09-26	CJY	BGS+RT6	4-7AM		0	0	0	0
2013-09-26	NCA	BGS+RT6	4-7AM		0	0	0	0
2013-09-26	NCA	BGS+RT6	4-7AM		0	0	0	0
2013-09-26	CJY	BGS+RT2	4-7PM		0	10	8	18
2013-09-26	CJY	BGS+RT2	4-7PM		0	36	14	50
2013-09-26	NCA	BGS+RT2	4-7PM		0	2	5	7
2013-09-26	NCA	BGS+RT2	4-7PM		0	4	2	6
2013-09-26	CJY	BGS+RT7	7-10AM		0	0	0	0
2013-09-26	CJY	BGS+RT7	7-10AM		0	0	0	0
2013-09-26	NCA	BGS+RT7	7-10AM		1	0	0	0
2013-09-26	NCA	BGS+RT7	7-10AM		0	1	0	1
2013-09-26	CJY	BGS+RT3	7-10PM		0	0	0	0
2013-09-26	CJY	BGS+RT3	7-10PM		0	4	1	5
2013-09-26	NCA	BGS+RT3	7-10PM		0	0	0	0
2013-09-26	NCA	BGS+RT3	7-10PM		0	0	1	1
2013-10-03	CJY	BGS+RT1	1-4PM	2	0	4	0	4
2013-10-03	CJY	BGS+RT1	1-4PM	2	0	0	3	3
2013-10-03	NCA	BGS+RT1	1-4PM	2	0	4	0	4
2013-10-03	CJY	BGS+RT8	10AM-1PM		0	1	0	1
2013-10-03	CJY	BGS+RT8	10AM-1PM		0	7	6	13
2013-10-03	NCA	BGS+RT8	10AM-1PM		0	4	2	6
2013-10-03	CJY	BGS+RT4	10PM-1AM		0	0	0	0
2013-10-03	CJY	BGS+RT4	10PM-1AM		0	1	0	1
2013-10-03	NCA	BGS+RT4	10PM-1AM		1	0	0	0
2013-10-03	CJY	BGS+RT5	1-4AM		0	0	0	0
2013-10-03	CJY	BGS+RT5	1-4AM		0	0	1	1
2013-10-03	NCA	BGS+RT5	1-4AM		0	0	0	0
2013-10-03	CJY	BGS+RT6	4-7AM		0	0	0	0
2013-10-03	CJY	BGS+RT6	4-7AM		0	0	1	1
2013-10-03	NCA	BGS+RT6	4-7AM		0	0	0	0
2013-10-03	CJY	BGS+RT2	4-7PM		0	30	16	46
2013-10-03	CJY	BGS+RT2	4-7PM		0	25	10	35
2013-10-03	NCA	BGS+RT2	4-7PM		0	2	0	2
2013-10-03	CJY	BGS+RT7	7-10AM		0	0	0	0
2013-10-03	CJY	BGS+RT7	7-10AM		0	1	2	3
2013-10-03	NCA	BGS+RT7	7-10AM		1			0
2013-10-03	CJY	BGS+RT3	7-10PM		0	1	0	1
2013-10-03	CJY	BGS+RT3	7-10PM		0	7	4	11
2013-10-03	NCA	BGS+RT3	7-10PM		0	0	0	0
2013-10-10	CJY	BGS+RT1	1-4PM	2	0	1	0	1
2013-10-10	CJY	BGS+RT1	1-4PM	2	0	4	1	5
2013-10-10	NCA	BGS+RT1	1-4PM	2	0	0	0	0
2013-10-10	NCA	BGS+RT1	1-4PM	2	0	1	0	1
2013-10-10	CJY	BGS+RT8	10AM-1PM		0	0	4	4
2013-10-10	CJY	BGS+RT8	10AM-1PM		0	10	3	13
2013-10-10	NCA	BGS+RT8	10AM-1PM		0	2	1	3
2013-10-10	NCA	BGS+RT8	10AM-1PM		0	7	1	8
2013-10-10	CJY	BGS+RT4	10PM-1AM		0	0	0	0
2013-10-10	CJY	BGS+RT4	10PM-1AM		0	1	0	1
2013-10-10	NCA	BGS+RT4	10PM-1AM		1	0	0	0
2013-10-10	NCA	BGS+RT4	10PM-1AM		0	0	0	0
2013-10-10	CJY	BGS+RT5	1-4AM		0	0	0	0
2013-10-10	CJY	BGS+RT5	1-4AM		0	0	0	0
2013-10-10	NCA	BGS+RT5	1-4AM		0	0	0	0
2013-10-10	NCA	BGS+RT5	1-4AM		0	0	0	0
2013-10-10	CJY	BGS+RT6	4-7AM		0	0	0	0
2013-10-10	CJY	BGS+RT6	4-7AM		0	0	0	0
2013-10-10	NCA	BGS+RT6	4-7AM		0	0	0	0
2013-10-10	NCA	BGS+RT6	4-7AM		0	0	0	0
2013-10-10	CJY	BGS+RT2	4-7PM		0	1	0	1
2013-10-10	CJY	BGS+RT2	4-7PM		0	9	3	12
2013-10-10	NCA	BGS+RT2	4-7PM		0	0	0	0
2013-10-10	NCA	BGS+RT2	4-7PM		0	4	1	5
2013-10-10	CJY	BGS+RT7	7-10AM		0	0	0	0
2013-10-10	CJY	BGS+RT7	7-10AM		0	0	0	0
2013-10-10	NCA	BGS+RT7	7-10AM		1	0	0	0
2013-10-10	NCA	BGS+RT7	7-10AM		0	0	0	0
2013-10-10	CJY	BGS+RT3	7-10PM		0	0	0	0
2013-10-10	CJY	BGS+RT3	7-10PM		0	4	2	6
2013-10-10	NCA	BGS+RT3	7-10PM		0	0	0	0
2013-10-10	NCA	BGS+RT3	7-10PM		0	0	0	0
2013-10-16	CJY	BGS+RT1	1-4PM	2	0	18	1	19
2013-10-16	CJY	BGS+RT1	1-4PM	2	0	6	1	7
2013-10-16	NCA	BGS+RT1	1-4PM	2	0	5	1	6
2013-10-16	NCA	BGS+RT1	1-4PM	2	0	1	0	1
2013-10-16	CJY	BGS+RT8	10AM-1PM		0	5	1	6
2013-10-16	CJY	BGS+RT8	10AM-1PM		0	8	2	10
2013-10-16	NCA	BGS+RT8	10AM-1PM		0	9	2	11
2013-10-16	NCA	BGS+RT8	10AM-1PM		0	3	1	4
2013-10-16	CJY	BGS+RT4	10PM-1AM		0	3	1	4
2013-10-16	CJY	BGS+RT4	10PM-1AM		0	0	0	0
2013-10-16	NCA	BGS+RT4	10PM-1AM		1	0	0	0
2013-10-16	NCA	BGS+RT4	10PM-1AM		0	0	0	0
2013-10-16	CJY	BGS+RT5	1-4AM		0	1	0	1
2013-10-16	CJY	BGS+RT5	1-4AM		0	2	0	2
2013-10-16	NCA	BGS+RT5	1-4AM		0	0	0	0
2013-10-16	NCA	BGS+RT5	1-4AM		0	0	0	0
2013-10-16	CJY	BGS+RT6	4-7AM		0	1	0	1
2013-10-16	CJY	BGS+RT6	4-7AM		0	2	0	2
2013-10-16	NCA	BGS+RT6	4-7AM		0	0	0	0
2013-10-16	NCA	BGS+RT6	4-7AM		0	0	0	0
2013-10-16	CJY	BGS+RT2	4-7PM		0	5	3	8
2013-10-16	CJY	BGS+RT2	4-7PM		0	7	5	12
2013-10-16	NCA	BGS+RT2	4-7PM		0	3	0	3
2013-10-16	NCA	BGS+RT2	4-7PM		0	1	0	1
2013-10-16	CJY	BGS+RT7	7-10AM		0	0	0	0
2013-10-16	CJY	BGS+RT7	7-10AM		0	1	0	1
2013-10-16	NCA	BGS+RT7	7-10AM		1	0	0	0
2013-10-16	NCA	BGS+RT7	7-10AM		0	0	1	1
2013-10-16	CJY	BGS+RT3	7-10PM		0	12	4	16
2013-10-16	CJY	BGS+RT3	7-10PM		0	10	7	17
2013-10-16	NCA	BGS+RT3	7-10PM		0	0	0	0
2013-10-16	NCA	BGS+RT3	7-10PM		0	0	0	0
2013-10-22	CJY	BGS+RT1	1-4PM	2	0	1	0	1
2013-10-22	CJY	BGS+RT1	1-4PM	2	0	4	1	5
2013-10-22	NCA	BGS+RT1	1-4PM	2	0	0	0	0
2013-10-22	NCA	BGS+RT1	1-4PM	2	0	0	0	0
2013-10-22	CJY	BGS+RT8	10AM-1PM		0	2	0	2
2013-10-22	CJY	BGS+RT8	10AM-1PM		0	1	0	1
2013-10-22	NCA	BGS+RT8	10AM-1PM		0	0	3	3
2013-10-22	NCA	BGS+RT8	10AM-1PM		0	3	1	4
2013-10-22	CJY	BGS+RT4	10PM-1AM		0	0	0	0
2013-10-22	CJY	BGS+RT4	10PM-1AM		0	0	0	0
2013-10-22	NCA	BGS+RT4	10PM-1AM		1	0	0	0
2013-10-22	NCA	BGS+RT4	10PM-1AM		0	0	0	0
2013-10-22	CJY	BGS+RT5	1-4AM		0	0	0	0
2013-10-22	CJY	BGS+RT5	1-4AM		0	0	0	0
2013-10-22	NCA	BGS+RT5	1-4AM		0	0	0	0
2013-10-22	NCA	BGS+RT5	1-4AM		0	0	0	0
2013-10-22	CJY	BGS+RT6	4-7AM		0	0	0	0
2013-10-22	CJY	BGS+RT6	4-7AM		0	0	0	0
2013-10-22	NCA	BGS+RT6	4-7AM		0	3	0	3
2013-10-22	NCA	BGS+RT6	4-7AM		0	0	0	0
2013-10-22	CJY	BGS+RT2	4-7PM		0	4	3	7
2013-10-22	CJY	BGS+RT2	4-7PM		0	7	2	9
2013-10-22	NCA	BGS+RT2	4-7PM		0	0	0	0
2013-10-22	NCA	BGS+RT2	4-7PM		0	0	0	0
2013-10-22	CJY	BGS+RT7	7-10AM		0	0	0	0
2013-10-22	CJY	BGS+RT7	7-10AM		0	0	0	0
2013-10-22	NCA	BGS+RT7	7-10AM		1	0	0	0
2013-10-22	NCA	BGS+RT7	7-10AM		0	0	0	0
2013-10-22	CJY	BGS+RT3	7-10PM		0	0	0	0
2013-10-22	CJY	BGS+RT3	7-10PM		0	0	0	0
2013-10-22	NCA	BGS+RT3	7-10PM		0	0	0	0
2013-10-22	NCA	BGS+RT3	7-10PM		0	0	0	0

## Sheet: New Jersey landing rate
Date	Site	Trap type	Time	Season	Total
2013-09-05	2050 S. Broad	HLR	sun rise	2	3
2013-09-05	1407 Williams	HLR	sun rise	2	1
2013-09-05	204 Grand	HLR	sun rise	2	0
2013-09-05	20 Grand	HLR	sun rise	2	1
2013-09-05	626 Parkinson	HLR	sun rise	2	2
2013-09-05	423 Walnut	HLR	sun rise	2	2
2013-09-05	35 Garfield	HLR	sun rise	2	0
2013-09-05	307 Cuyler	HLR	sun rise	2	2
2013-09-05	310 Garfield	HLR	sun rise	2	2
2013-09-05	326 Cleveland	HLR	sun rise	2	0
2013-09-05	2050 S. Broad	HLR	sun rise	2	0
2013-09-05	1407 Williams	HLR	sun rise	2	1
2013-09-05	204 Grand	HLR	sun rise	2	0
2013-09-05	20 Grand	HLR	sun rise	2	0
2013-09-05	626 Parkinson	HLR	sun rise	2	1
2013-09-05	423 Walnut	HLR	sun rise	2	1
2013-09-05	35 Garfield	HLR	sun rise	2	0
2013-09-05	307 Cuyler	HLR	sun rise	2	1
2013-09-05	310 Garfield	HLR	sun rise	2	2
2013-09-05	326 Cleveland	HLR	sun rise	2	2
2013-09-11	2050 S. Broad	HLR	sun rise	2	7
2013-09-11	1407 Williams	HLR	sun rise	2	4
2013-09-11	204 Grand	HLR	sun rise	2	5
2013-09-11	20 Grand	HLR	sun rise	2	1
2013-09-11	626 Parkinson	HLR	sun rise	2	2
2013-09-11	423 Walnut	HLR	sun rise	2	2
2013-09-11	35 Garfield	HLR	sun rise	2	7
2013-09-11	307 Cuyler	HLR	sun rise	2	7
2013-09-11	310 Garfield	HLR	sun rise	2	3
2013-09-11	326 Cleveland	HLR	sun rise	2	4
2013-09-11	2050 S. Broad	HLR	sun rise	2	4
2013-09-11	1407 Williams	HLR	sun rise	2	1
2013-09-11	204 Grand	HLR	sun rise	2	1
2013-09-11	20 Grand	HLR	sun rise	2	3
2013-09-11	626 Parkinson	HLR	sun rise	2	4
2013-09-11	423 Walnut	HLR	sun rise	2	4
2013-09-11	35 Garfield	HLR	sun rise	2	3
2013-09-11	307 Cuyler	HLR	sun rise	2	1
2013-09-11	310 Garfield	HLR	sun rise	2	1
2013-09-11	326 Cleveland	HLR	sun rise	2	1
2013-09-19	2050 S. Broad	HLR	sun rise	2	0
2013-09-19	1407 Williams	HLR	sun rise	2	0
2013-09-19	204 Grand	HLR	sun rise	2	0
2013-09-19	20 Grand	HLR	sun rise	2	0
2013-09-19	626 Parkinson	HLR	sun rise	2	0
2013-09-19	423 Walnut	HLR	sun rise	2	0
2013-09-19	35 Garfield	HLR	sun rise	2	0
2013-09-19	307 Cuyler	HLR	sun rise	2	0
2013-09-19	310 Garfield	HLR	sun rise	2	0
2013-09-19	326 Cleveland	HLR	sun rise	2	0
2013-09-19	2050 S. Broad	HLR	sun rise	2	0
2013-09-19	1407 Williams	HLR	sun rise	2	0
2013-09-19	204 Grand	HLR	sun rise	2	0
2013-09-19	20 Grand	HLR	sun rise	2	0
2013-09-19	626 Parkinson	HLR	sun rise	2	0
2013-09-19	423 Walnut	HLR	sun rise	2	0
2013-09-19	35 Garfield	HLR	sun rise	2	0
2013-09-19	307 Cuyler	HLR	sun rise	2	0
2013-09-19	310 Garfield	HLR	sun rise	2	0
2013-09-19	326 Cleveland	HLR	sun rise	2	0
2013-09-26	2050 S. Broad	HLR	sun rise	2	1
2013-09-26	1407 Williams	HLR	sun rise	2	0
2013-09-26	204 Grand	HLR	sun rise	2	0
2013-09-26	20 Grand	HLR	sun rise	2	0
2013-09-26	626 Parkinson	HLR	sun rise	2	0
2013-09-26	423 Walnut	HLR	sun rise	2	0
2013-09-26	35 Garfield	HLR	sun rise	2	0
2013-09-26	307 Cuyler	HLR	sun rise	2	0
2013-09-26	310 Garfield	HLR	sun rise	2	2
2013-09-26	326 Cleveland	HLR	sun rise	2	0
2013-09-26	2050 S. Broad	HLR	sun rise	2	0
2013-09-26	1407 Williams	HLR	sun rise	2	0
2013-09-26	204 Grand	HLR	sun rise	2	0
2013-09-26	20 Grand	HLR	sun rise	2	0
2013-09-26	626 Parkinson	HLR	sun rise	2	0
2013-09-26	423 Walnut	HLR	sun rise	2	0
2013-09-26	35 Garfield	HLR	sun rise	2	0
2013-09-26	307 Cuyler	HLR	sun rise	2	0
2013-09-26	310 Garfield	HLR	sun rise	2	0
2013-09-26	326 Cleveland	HLR	sun rise	2	0
2013-10-03	2050 S. Broad	HLR	sun rise	2	1
2013-10-03	1407 Williams	HLR	sun rise	2	0
2013-10-03	204 Grand	HLR	sun rise	2	0
2013-10-03	20 Grand	HLR	sun rise	2	0
2013-10-03	626 Parkinson	HLR	sun rise	2	0
2013-10-03	423 Walnut	HLR	sun rise	2	0
2013-10-03	35 Garfield	HLR	sun rise	2	0
2013-10-03	307 Cuyler	HLR	sun rise	2	0
2013-10-03	310 Garfield	HLR	sun rise	2	0
2013-10-03	326 Cleveland	HLR	sun rise	2	0
2013-10-03	2050 S. Broad	HLR	sun rise	2	0
2013-10-03	1407 Williams	HLR	sun rise	2	0
2013-10-03	204 Grand	HLR	sun rise	2	0
2013-10-03	20 Grand	HLR	sun rise	2	0
2013-10-03	626 Parkinson	HLR	sun rise	2	0
2013-10-03	423 Walnut	HLR	sun rise	2	0
2013-10-03	35 Garfield	HLR	sun rise	2	0
2013-10-03	307 Cuyler	HLR	sun rise	2	0
2013-10-03	310 Garfield	HLR	sun rise	2	0
2013-10-03	326 Cleveland	HLR	sun rise	2	0
2013-08-08	2050 S. Broad	HLR	sun rise	1	0
2013-08-08	1407 Williams	HLR	sun rise	1	3
2013-08-08	204 Grand	HLR	sun rise	1	1
2013-08-08	20 Grand	HLR	sun rise	1	0
2013-08-08	626 Parkinson	HLR	sun rise	1	2
2013-08-08	423 Walnut	HLR	sun rise	1	1
2013-08-08	35 Garfield	HLR	sun rise	1	3
2013-08-08	307 Cuyler	HLR	sun rise	1	0
2013-08-08	310 Garfield	HLR	sun rise	1	1
2013-08-08	326 Cleveland	HLR	sun rise	1	0
2013-08-08	2050 S. Broad	HLR	sun rise	1	3
2013-08-08	1407 Williams	HLR	sun rise	1	1
2013-08-08	204 Grand	HLR	sun rise	1	3
2013-08-08	20 Grand	HLR	sun rise	1	2
2013-08-08	626 Parkinson	HLR	sun rise	1	1
2013-08-08	423 Walnut	HLR	sun rise	1	1
2013-08-08	35 Garfield	HLR	sun rise	1	1
2013-08-08	307 Cuyler	HLR	sun rise	1	3
2013-08-08	310 Garfield	HLR	sun rise	1	0
2013-08-08	326 Cleveland	HLR	sun rise	1	0
2013-08-15	2050 S. Broad	HLR	sun rise	1	0
2013-08-15	1407 Williams	HLR	sun rise	1	0
2013-08-15	204 Grand	HLR	sun rise	1	0
2013-08-15	20 Grand	HLR	sun rise	1	0
2013-08-15	626 Parkinson	HLR	sun rise	1	0
2013-08-15	423 Walnut	HLR	sun rise	1	0
2013-08-15	35 Garfield	HLR	sun rise	1	1
2013-08-15	307 Cuyler	HLR	sun rise	1	0
2013-08-15	310 Garfield	HLR	sun rise	1	0
2013-08-15	326 Cleveland	HLR	sun rise	1	0
2013-08-15	2050 S. Broad	HLR	sun rise	1	0
2013-08-15	1407 Williams	HLR	sun rise	1	2
2013-08-15	204 Grand	HLR	sun rise	1	0
2013-08-15	20 Grand	HLR	sun rise	1	0
2013-08-15	626 Parkinson	HLR	sun rise	1	0
2013-08-15	423 Walnut	HLR	sun rise	1	0
2013-08-15	35 Garfield	HLR	sun rise	1	0
2013-08-15	307 Cuyler	HLR	sun rise	1	0
2013-08-15	310 Garfield	HLR	sun rise	1	1
2013-08-15	326 Cleveland	HLR	sun rise	1	0
2013-08-21	2050 S. Broad	HLR	sun rise	1	0
2013-08-21	1407 Williams	HLR	sun rise	1	2
2013-08-21	204 Grand	HLR	sun rise	1	0
2013-08-21	20 Grand	HLR	sun rise	1	1
2013-08-21	626 Parkinson	HLR	sun rise	1	0
2013-08-21	423 Walnut	HLR	sun rise	1	0
2013-08-21	35 Garfield	HLR	sun rise	1	0
2013-08-21	307 Cuyler	HLR	sun rise	1	1
2013-08-21	310 Garfield	HLR	sun rise	1	0
2013-08-21	326 Cleveland	HLR	sun rise	1	0
2013-08-21	2050 S. Broad	HLR	sun rise	1	3
2013-08-21	1407 Williams	HLR	sun rise	1	2
2013-08-21	204 Grand	HLR	sun rise	1	1
2013-08-21	20 Grand	HLR	sun rise	1	2
2013-08-21	626 Parkinson	HLR	sun rise	1	5
2013-08-21	423 Walnut	HLR	sun rise	1	1
2013-08-21	35 Garfield	HLR	sun rise	1	0
2013-08-21	307 Cuyler	HLR	sun rise	1	2
2013-08-21	310 Garfield	HLR	sun rise	1	0
2013-08-21	326 Cleveland	HLR	sun rise	1	0
2013-08-29	2050 S. Broad	HLR	sun rise	1	1
2013-08-29	1407 Williams	HLR	sun rise	1	1
2013-08-29	204 Grand	HLR	sun rise	1	0
2013-08-29	20 Grand	HLR	sun rise	1	0
2013-08-29	626 Parkinson	HLR	sun rise	1	1
2013-08-29	423 Walnut	HLR	sun rise	1	6
2013-08-29	35 Garfield	HLR	sun rise	1	2
2013-08-29	307 Cuyler	HLR	sun rise	1	3
2013-08-29	310 Garfield	HLR	sun rise	1	2
2013-08-29	326 Cleveland	HLR	sun rise	1	2
2013-08-29	2050 S. Broad	HLR	sun rise	1	3
2013-08-29	1407 Williams	HLR	sun rise	1	1
2013-08-29	204 Grand	HLR	sun rise	1	0
2013-08-29	20 Grand	HLR	sun rise	1	2
2013-08-29	626 Parkinson	HLR	sun rise	1	1
2013-08-29	423 Walnut	HLR	sun rise	1	1
2013-08-29	35 Garfield	HLR	sun rise	1	3
2013-08-29	307 Cuyler	HLR	sun rise	1	2
2013-08-29	310 Garfield	HLR	sun rise	1	1
2013-08-29	326 Cleveland	HLR	sun rise	1	0
2013-09-05	1407 Williams	HLR	solar noon	2	9
2013-09-05	204 Grand	HLR	solar noon	2	4
2013-09-05	20 Grand	HLR	solar noon	2	2
2013-09-05	626 Parkinson	HLR	solar noon	2	18
2013-09-05	423 Walnut	HLR	solar noon	2	1
2013-09-05	35 Garfield	HLR	solar noon	2	2
2013-09-05	307 Cuyler	HLR	solar noon	2	7
2013-09-05	310 Garfield	HLR	solar noon	2	3
2013-09-05	326 Cleveland	HLR	solar noon	2	2
2013-09-05	2050 S. Broad	HLR	solar noon	2	0
2013-09-05	1407 Williams	HLR	solar noon	2	5
2013-09-05	204 Grand	HLR	solar noon	2	3
2013-09-05	20 Grand	HLR	solar noon	2	1
2013-09-05	626 Parkinson	HLR	solar noon	2	7
2013-09-05	423 Walnut	HLR	solar noon	2	2
2013-09-05	35 Garfield	HLR	solar noon	2	5
2013-09-05	307 Cuyler	HLR	solar noon	2	1
2013-09-05	310 Garfield	HLR	solar noon	2	3
2013-09-05	326 Cleveland	HLR	solar noon	2	1
2013-09-11	2050 S. Broad	HLR	solar noon	2	1
2013-09-11	1407 Williams	HLR	solar noon	2	0
2013-09-11	204 Grand	HLR	solar noon	2	3
2013-09-11	20 Grand	HLR	solar noon	2	0
2013-09-11	626 Parkinson	HLR	solar noon	2	0
2013-09-11	423 Walnut	HLR	solar noon	2	1
2013-09-11	35 Garfield	HLR	solar noon	2	4
2013-09-11	307 Cuyler	HLR	solar noon	2	1
2013-09-11	310 Garfield	HLR	solar noon	2	0
2013-09-11	326 Cleveland	HLR	solar noon	2	2
2013-09-11	2050 S. Broad	HLR	solar noon	2	1
2013-09-11	1407 Williams	HLR	solar noon	2	1
2013-09-11	204 Grand	HLR	solar noon	2	3
2013-09-11	20 Grand	HLR	solar noon	2	0
2013-09-11	626 Parkinson	HLR	solar noon	2	2
2013-09-11	423 Walnut	HLR	solar noon	2	0
2013-09-11	35 Garfield	HLR	solar noon	2	8
2013-09-11	307 Cuyler	HLR	solar noon	2	2
2013-09-11	310 Garfield	HLR	solar noon	2	3
2013-09-11	326 Cleveland	HLR	solar noon	2	2
2013-09-19	2050 S. Broad	HLR	solar noon	2	4
2013-09-19	1407 Williams	HLR	solar noon	2	3
2013-09-19	204 Grand	HLR	solar noon	2	3
2013-09-19	20 Grand	HLR	solar noon	2	4
2013-09-19	626 Parkinson	HLR	solar noon	2	6
2013-09-19	423 Walnut	HLR	solar noon	2	1
2013-09-19	35 Garfield	HLR	solar noon	2	1
2013-09-19	307 Cuyler	HLR	solar noon	2	2
2013-09-19	310 Garfield	HLR	solar noon	2	1
2013-09-19	326 Cleveland	HLR	solar noon	2	1
2013-09-19	2050 S. Broad	HLR	solar noon	2	3
2013-09-19	1407 Williams	HLR	solar noon	2	4
2013-09-19	204 Grand	HLR	solar noon	2	2
2013-09-19	20 Grand	HLR	solar noon	2	2
2013-09-19	626 Parkinson	HLR	solar noon	2	4
2013-09-19	423 Walnut	HLR	solar noon	2	1
2013-09-19	35 Garfield	HLR	solar noon	2	2
2013-09-19	307 Cuyler	HLR	solar noon	2	2
2013-09-19	310 Garfield	HLR	solar noon	2	1
2013-09-19	326 Cleveland	HLR	solar noon	2	2
2013-09-26	2050 S. Broad	HLR	solar noon	2	5
2013-09-26	1407 Williams	HLR	solar noon	2	0
2013-09-26	204 Grand	HLR	solar noon	2	0
2013-09-26	20 Grand	HLR	solar noon	2	2
2013-09-26	626 Parkinson	HLR	solar noon	2	4
2013-09-26	423 Walnut	HLR	solar noon	2	2
2013-09-26	35 Garfield	HLR	solar noon	2	0
2013-09-26	307 Cuyler	HLR	solar noon	2	3
2013-09-26	310 Garfield	HLR	solar noon	2	3
2013-09-26	326 Cleveland	HLR	solar noon	2	2
2013-09-26	2050 S. Broad	HLR	solar noon	2	1
2013-09-26	1407 Williams	HLR	solar noon	2	0
2013-09-26	204 Grand	HLR	solar noon	2	0
2013-09-26	20 Grand	HLR	solar noon	2	4
2013-09-26	626 Parkinson	HLR	solar noon	2	5
2013-09-26	423 Walnut	HLR	solar noon	2	1
2013-09-26	35 Garfield	HLR	solar noon	2	0
2013-09-26	307 Cuyler	HLR	solar noon	2	3
2013-09-26	310 Garfield	HLR	solar noon	2	5
2013-09-26	326 Cleveland	HLR	solar noon	2	3
2013-10-03	2050 S. Broad	HLR	solar noon	2	0
2013-10-03	1407 Williams	HLR	solar noon	2	3
2013-10-03	204 Grand	HLR	solar noon	2	0
2013-10-03	20 Grand	HLR	solar noon	2	0
2013-10-03	626 Parkinson	HLR	solar noon	2	1
2013-10-03	423 Walnut	HLR	solar noon	2	0
2013-10-03	35 Garfield	HLR	solar noon	2	0
2013-10-03	307 Cuyler	HLR	solar noon	2	0
2013-10-03	310 Garfield	HLR	solar noon	2	1
2013-10-03	326 Cleveland	HLR	solar noon	2	0
2013-10-03	2050 S. Broad	HLR	solar noon	2	0
2013-10-03	1407 Williams	HLR	solar noon	2	4
2013-10-03	204 Grand	HLR	solar noon	2	0
2013-10-03	20 Grand	HLR	solar noon	2	0
2013-10-03	626 Parkinson	HLR	solar noon	2	1
2013-10-03	423 Walnut	HLR	solar noon	2	0
2013-10-03	35 Garfield	HLR	solar noon	2	0
2013-10-03	307 Cuyler	HLR	solar noon	2	0
2013-10-03	310 Garfield	HLR	solar noon	2	2
2013-10-03	326 Cleveland	HLR	solar noon	2	1
2013-08-08	2050 S. Broad	HLR	solar noon	1	1
2013-08-08	1407 Williams	HLR	solar noon	1	0
2013-08-08	204 Grand	HLR	solar noon	1	1
2013-08-08	20 Grand	HLR	solar noon	1	0
2013-08-08	626 Parkinson	HLR	solar noon	1	2
2013-08-08	423 Walnut	HLR	solar noon	1	0
2013-08-08	35 Garfield	HLR	solar noon	1	1
2013-08-08	307 Cuyler	HLR	solar noon	1	0
2013-08-08	310 Garfield	HLR	solar noon	1	3
2013-08-08	326 Cleveland	HLR	solar noon	1	1
2013-08-08	2050 S. Broad	HLR	solar noon	1	1
2013-08-08	1407 Williams	HLR	solar noon	1	1
2013-08-08	204 Grand	HLR	solar noon	1	4
2013-08-08	20 Grand	HLR	solar noon	1	0
2013-08-08	626 Parkinson	HLR	solar noon	1	5
2013-08-08	423 Walnut	HLR	solar noon	1	0
2013-08-08	35 Garfield	HLR	solar noon	1	2
2013-08-08	307 Cuyler	HLR	solar noon	1	3
2013-08-08	310 Garfield	HLR	solar noon	1	3
2013-08-08	326 Cleveland	HLR	solar noon	1	1
2013-08-15	2050 S. Broad	HLR	solar noon	1	1
2013-08-15	1407 Williams	HLR	solar noon	1	3
2013-08-15	204 Grand	HLR	solar noon	1	0
2013-08-15	20 Grand	HLR	solar noon	1	0
2013-08-15	626 Parkinson	HLR	solar noon	1	1
2013-08-15	423 Walnut	HLR	solar noon	1	0
2013-08-15	35 Garfield	HLR	solar noon	1	0
2013-08-15	307 Cuyler	HLR	solar noon	1	0
2013-08-15	310 Garfield	HLR	solar noon	1	1
2013-08-15	326 Cleveland	HLR	solar noon	1	0
2013-08-15	2050 S. Broad	HLR	solar noon	1	0
2013-08-15	1407 Williams	HLR	solar noon	1	0
2013-08-15	204 Grand	HLR	solar noon	1	0
2013-08-15	20 Grand	HLR	solar noon	1	0
2013-08-15	626 Parkinson	HLR	solar noon	1	0
2013-08-15	423 Walnut	HLR	solar noon	1	2
2013-08-15	35 Garfield	HLR	solar noon	1	0
2013-08-15	307 Cuyler	HLR	solar noon	1	0
2013-08-15	310 Garfield	HLR	solar noon	1	0
2013-08-15	326 Cleveland	HLR	solar noon	1	0
2013-08-21	2050 S. Broad	HLR	solar noon	1	1
2013-08-21	1407 Williams	HLR	solar noon	1	5
2013-08-21	204 Grand	HLR	solar noon	1	1
2013-08-21	20 Grand	HLR	solar noon	1	2
2013-08-21	626 Parkinson	HLR	solar noon	1	2
2013-08-21	423 Walnut	HLR	solar noon	1	0
2013-08-21	35 Garfield	HLR	solar noon	1	0
2013-08-21	307 Cuyler	HLR	solar noon	1	2
2013-08-21	310 Garfield	HLR	solar noon	1	2
2013-08-21	326 Cleveland	HLR	solar noon	1	0
2013-08-21	2050 S. Broad	HLR	solar noon	1	1
2013-08-21	1407 Williams	HLR	solar noon	1	0
2013-08-21	204 Grand	HLR	solar noon	1	4
2013-08-21	20 Grand	HLR	solar noon	1	2
2013-08-21	626 Parkinson	HLR	solar noon	1	0
2013-08-21	423 Walnut	HLR	solar noon	1	1
2013-08-21	35 Garfield	HLR	solar noon	1	2
2013-08-21	307 Cuyler	HLR	solar noon	1	3
2013-08-21	310 Garfield	HLR	solar noon	1	2
2013-08-21	326 Cleveland	HLR	solar noon	1	0
2013-08-29	2050 S. Broad	HLR	solar noon	1	9
2013-08-29	1407 Williams	HLR	solar noon	1	9
2013-08-29	204 Grand	HLR	solar noon	1	2
2013-08-29	20 Grand	HLR	solar noon	1	4
2013-08-29	626 Parkinson	HLR	solar noon	1	1
2013-08-29	423 Walnut	HLR	solar noon	1	5
2013-08-29	35 Garfield	HLR	solar noon	1	15
2013-08-29	307 Cuyler	HLR	solar noon	1	9
2013-08-29	310 Garfield	HLR	solar noon	1	1
2013-08-29	326 Cleveland	HLR	solar noon	1	5
2013-08-29	2050 S. Broad	HLR	solar noon	1	3
2013-08-29	1407 Williams	HLR	solar noon	1	3
2013-08-29	204 Grand	HLR	solar noon	1	4
2013-08-29	20 Grand	HLR	solar noon	1	1
2013-08-29	626 Parkinson	HLR	solar noon	1	3
2013-08-29	423 Walnut	HLR	solar noon	1	6
2013-08-29	35 Garfield	HLR	solar noon	1	6
2013-08-29	307 Cuyler	HLR	solar noon	1	1
2013-08-29	310 Garfield	HLR	solar noon	1	4
2013-08-29	326 Cleveland	HLR	solar noon	1	1
2013-09-05	2050 S. Broad	HLR	solar noon	2	0
2013-09-05	2050 S. Broad	HLR	sunset	2	2
2013-09-05	1407 Williams	HLR	sunset	2	0
2013-09-05	204 Grand	HLR	sunset	2	0
2013-09-05	20 Grand	HLR	sunset	2	0
2013-09-05	626 Parkinson	HLR	sunset	2	1
2013-09-05	423 Walnut	HLR	sunset	2	0
2013-09-05	35 Garfield	HLR	sunset	2	1
2013-09-05	307 Cuyler	HLR	sunset	2	1
2013-09-05	310 Garfield	HLR	sunset	2	0
2013-09-05	326 Cleveland	HLR	sunset	2	3
2013-09-05	2050 S. Broad	HLR	sunset	2	1
2013-09-05	1407 Williams	HLR	sunset	2	0
2013-09-05	204 Grand	HLR	sunset	2	0
2013-09-05	20 Grand	HLR	sunset	2	0
2013-09-05	626 Parkinson	HLR	sunset	2	1
2013-09-05	423 Walnut	HLR	sunset	2	1
2013-09-05	35 Garfield	HLR	sunset	2	5
2013-09-05	307 Cuyler	HLR	sunset	2	2
2013-09-05	310 Garfield	HLR	sunset	2	2
2013-09-05	326 Cleveland	HLR	sunset	2	1
2013-09-11	2050 S. Broad	HLR	sunset	2	3
2013-09-11	1407 Williams	HLR	sunset	2	0
2013-09-11	204 Grand	HLR	sunset	2	0
2013-09-11	20 Grand	HLR	sunset	2	1
2013-09-11	626 Parkinson	HLR	sunset	2	2
2013-09-11	423 Walnut	HLR	sunset	2	2
2013-09-11	35 Garfield	HLR	sunset	2	1
2013-09-11	307 Cuyler	HLR	sunset	2	0
2013-09-11	310 Garfield	HLR	sunset	2	1
2013-09-11	326 Cleveland	HLR	sunset	2	12
2013-09-11	2050 S. Broad	HLR	sunset	2	4
2013-09-11	1407 Williams	HLR	sunset	2	0
2013-09-11	204 Grand	HLR	sunset	2	1
2013-09-11	20 Grand	HLR	sunset	2	0
2013-09-11	626 Parkinson	HLR	sunset	2	0
2013-09-11	423 Walnut	HLR	sunset	2	2
2013-09-11	35 Garfield	HLR	sunset	2	5
2013-09-11	307 Cuyler	HLR	sunset	2	0
2013-09-11	310 Garfield	HLR	sunset	2	2
2013-09-11	326 Cleveland	HLR	sunset	2	1
2013-09-19	2050 S. Broad	HLR	sunset	2	0
2013-09-19	1407 Williams	HLR	sunset	2	1
2013-09-19	204 Grand	HLR	sunset	2	0
2013-09-19	20 Grand	HLR	sunset	2	3
2013-09-19	626 Parkinson	HLR	sunset	2	1
2013-09-19	423 Walnut	HLR	sunset	2	1
2013-09-19	35 Garfield	HLR	sunset	2	1
2013-09-19	307 Cuyler	HLR	sunset	2	1
2013-09-19	310 Garfield	HLR	sunset	2	2
2013-09-19	326 Cleveland	HLR	sunset	2	1
2013-09-19	2050 S. Broad	HLR	sunset	2	0
2013-09-19	1407 Williams	HLR	sunset	2	2
2013-09-19	204 Grand	HLR	sunset	2	1
2013-09-19	20 Grand	HLR	sunset	2	3
2013-09-19	626 Parkinson	HLR	sunset	2	0
2013-09-19	423 Walnut	HLR	sunset	2	2
2013-09-19	35 Garfield	HLR	sunset	2	2
2013-09-19	307 Cuyler	HLR	sunset	2	1
2013-09-19	310 Garfield	HLR	sunset	2	2
2013-09-19	326 Cleveland	HLR	sunset	2	4
2013-09-26	2050 S. Broad	HLR	sunset	2	0
2013-09-26	1407 Williams	HLR	sunset	2	0
2013-09-26	204 Grand	HLR	sunset	2	0
2013-09-26	20 Grand	HLR	sunset	2	0
2013-09-26	626 Parkinson	HLR	sunset	2	0
2013-09-26	423 Walnut	HLR	sunset	2	0
2013-09-26	35 Garfield	HLR	sunset	2	1
2013-09-26	307 Cuyler	HLR	sunset	2	0
2013-09-26	310 Garfield	HLR	sunset	2	0
2013-09-26	326 Cleveland	HLR	sunset	2	0
2013-09-26	2050 S. Broad	HLR	sunset	2	0
2013-09-26	1407 Williams	HLR	sunset	2	0
2013-09-26	204 Grand	HLR	sunset	2	0
2013-09-26	20 Grand	HLR	sunset	2	0
2013-09-26	626 Parkinson	HLR	sunset	2	0
2013-09-26	423 Walnut	HLR	sunset	2	0
2013-09-26	35 Garfield	HLR	sunset	2	0
2013-09-26	307 Cuyler	HLR	sunset	2	1
2013-09-26	310 Garfield	HLR	sunset	2	0
2013-09-26	326 Cleveland	HLR	sunset	2	2
2013-10-03	2050 S. Broad	HLR	sunset	2	0
2013-10-03	1407 Williams	HLR	sunset	2	0
2013-10-03	204 Grand	HLR	sunset	2	0
2013-10-03	20 Grand	HLR	sunset	2	0
2013-10-03	626 Parkinson	HLR	sunset	2	1
2013-10-03	423 Walnut	HLR	sunset	2	0
2013-10-03	35 Garfield	HLR	sunset	2	1
2013-10-03	307 Cuyler	HLR	sunset	2	0
2013-10-03	310 Garfield	HLR	sunset	2	0
2013-10-03	326 Cleveland	HLR	sunset	2	0
2013-10-03	2050 S. Broad	HLR	sunset	2	1
2013-10-03	1407 Williams	HLR	sunset	2	0
2013-10-03	204 Grand	HLR	sunset	2	0
2013-10-03	20 Grand	HLR	sunset	2	0
2013-10-03	626 Parkinson	HLR	sunset	2	0
2013-10-03	423 Walnut	HLR	sunset	2	0
2013-10-03	35 Garfield	HLR	sunset	2	0
2013-10-03	307 Cuyler	HLR	sunset	2	0
2013-10-03	310 Garfield	HLR	sunset	2	0
2013-10-03	326 Cleveland	HLR	sunset	2	0
2013-08-08	2050 S. Broad	HLR	sunset	1	0
2013-08-08	1407 Williams	HLR	sunset	1	4
2013-08-08	204 Grand	HLR	sunset	1	1
2013-08-08	20 Grand	HLR	sunset	1	0
2013-08-08	626 Parkinson	HLR	sunset	1	0
2013-08-08	423 Walnut	HLR	sunset	1	0
2013-08-08	35 Garfield	HLR	sunset	1	1
2013-08-08	307 Cuyler	HLR	sunset	1	2
2013-08-08	310 Garfield	HLR	sunset	1	0
2013-08-08	326 Cleveland	HLR	sunset	1	1
2013-08-08	2050 S. Broad	HLR	sunset	1	1
2013-08-08	1407 Williams	HLR	sunset	1	0
2013-08-08	204 Grand	HLR	sunset	1	1
2013-08-08	20 Grand	HLR	sunset	1	0
2013-08-08	626 Parkinson	HLR	sunset	1	2
2013-08-08	423 Walnut	HLR	sunset	1	1
2013-08-08	35 Garfield	HLR	sunset	1	5
2013-08-08	307 Cuyler	HLR	sunset	1	0
2013-08-08	310 Garfield	HLR	sunset	1	1
2013-08-08	326 Cleveland	HLR	sunset	1	3
2013-08-15	2050 S. Broad	HLR	sunset	1	0
2013-08-15	1407 Williams	HLR	sunset	1	0
2013-08-15	204 Grand	HLR	sunset	1	0
2013-08-15	20 Grand	HLR	sunset	1	0
2013-08-15	626 Parkinson	HLR	sunset	1	0
2013-08-15	423 Walnut	HLR	sunset	1	1
2013-08-15	35 Garfield	HLR	sunset	1	3
2013-08-15	307 Cuyler	HLR	sunset	1	0
2013-08-15	310 Garfield	HLR	sunset	1	3
2013-08-15	326 Cleveland	HLR	sunset	1	1
2013-08-15	2050 S. Broad	HLR	sunset	1	0
2013-08-15	1407 Williams	HLR	sunset	1	0
2013-08-15	204 Grand	HLR	sunset	1	0
2013-08-15	20 Grand	HLR	sunset	1	0
2013-08-15	626 Parkinson	HLR	sunset	1	0
2013-08-15	423 Walnut	HLR	sunset	1	0
2013-08-15	35 Garfield	HLR	sunset	1	1
2013-08-15	307 Cuyler	HLR	sunset	1	0
2013-08-15	310 Garfield	HLR	sunset	1	1
2013-08-15	326 Cleveland	HLR	sunset	1	2
2013-08-21	2050 S. Broad	HLR	sunset	1	3
2013-08-21	1407 Williams	HLR	sunset	1	0
2013-08-21	204 Grand	HLR	sunset	1	0
2013-08-21	20 Grand	HLR	sunset	1	0
2013-08-21	626 Parkinson	HLR	sunset	1	2
2013-08-21	423 Walnut	HLR	sunset	1	0
2013-08-21	35 Garfield	HLR	sunset	1	1
2013-08-21	307 Cuyler	HLR	sunset	1	1
2013-08-21	310 Garfield	HLR	sunset	1	0
2013-08-21	326 Cleveland	HLR	sunset	1	0
2013-08-21	2050 S. Broad	HLR	sunset	1	2
2013-08-21	1407 Williams	HLR	sunset	1	2
2013-08-21	204 Grand	HLR	sunset	1	0
2013-08-21	20 Grand	HLR	sunset	1	0
2013-08-21	626 Parkinson	HLR	sunset	1	0
2013-08-21	423 Walnut	HLR	sunset	1	0
2013-08-21	35 Garfield	HLR	sunset	1	4
2013-08-21	307 Cuyler	HLR	sunset	1	0
2013-08-21	310 Garfield	HLR	sunset	1	0
2013-08-21	326 Cleveland	HLR	sunset	1	0
2013-08-29	2050 S. Broad	HLR	sunset	1	0
2013-08-29	1407 Williams	HLR	sunset	1	0
2013-08-29	204 Grand	HLR	sunset	1	0
2013-08-29	20 Grand	HLR	sunset	1	0
2013-08-29	626 Parkinson	HLR	sunset	1	0
2013-08-29	423 Walnut	HLR	sunset	1	0
2013-08-29	35 Garfield	HLR	sunset	1	2
2013-08-29	307 Cuyler	HLR	sunset	1	2
2013-08-29	310 Garfield	HLR	sunset	1	1
2013-08-29	326 Cleveland	HLR	sunset	1	0
2013-08-29	2050 S. Broad	HLR	sunset	1	1
2013-08-29	1407 Williams	HLR	sunset	1	0
2013-08-29	204 Grand	HLR	sunset	1	1
2013-08-29	20 Grand	HLR	sunset	1	0
2013-08-29	626 Parkinson	HLR	sunset	1	1
2013-08-29	423 Walnut	HLR	sunset	1	0
2013-08-29	35 Garfield	HLR	sunset	1	2
2013-08-29	307 Cuyler	HLR	sunset	1	1
2013-08-29	310 Garfield	HLR	sunset	1	2
2013-08-29	326 Cleveland	HLR	sunset	1	0
2013-09-05	2050 S. Broad	HLR	lunar midnight	2	4
2013-09-05	1407 Williams	HLR	lunar midnight	2	1
2013-09-05	204 Grand	HLR	lunar midnight	2	2
2013-09-05	20 Grand	HLR	lunar midnight	2	1
2013-09-05	626 Parkinson	HLR	lunar midnight	2	1
2013-09-05	423 Walnut	HLR	lunar midnight	2	1
2013-09-05	35 Garfield	HLR	lunar midnight	2	3
2013-09-05	307 Cuyler	HLR	lunar midnight	2	1
2013-09-05	310 Garfield	HLR	lunar midnight	2	1
2013-09-05	326 Cleveland	HLR	lunar midnight	2	0
2013-09-05	2050 S. Broad	HLR	lunar midnight	2	3
2013-09-05	1407 Williams	HLR	lunar midnight	2	1
2013-09-05	204 Grand	HLR	lunar midnight	2	0
2013-09-05	20 Grand	HLR	lunar midnight	2	2
2013-09-05	626 Parkinson	HLR	lunar midnight	2	0
2013-09-05	423 Walnut	HLR	lunar midnight	2	1
2013-09-05	35 Garfield	HLR	lunar midnight	2	3
2013-09-05	307 Cuyler	HLR	lunar midnight	2	0
2013-09-05	310 Garfield	HLR	lunar midnight	2	1
2013-09-05	326 Cleveland	HLR	lunar midnight	2	1
2013-09-11	2050 S. Broad	HLR	lunar midnight	2	2
2013-09-11	1407 Williams	HLR	lunar midnight	2	1
2013-09-11	204 Grand	HLR	lunar midnight	2	4
2013-09-11	20 Grand	HLR	lunar midnight	2	3
2013-09-11	626 Parkinson	HLR	lunar midnight	2	1
2013-09-11	423 Walnut	HLR	lunar midnight	2	2
2013-09-11	35 Garfield	HLR	lunar midnight	2	2
2013-09-11	307 Cuyler	HLR	lunar midnight	2	1
2013-09-11	310 Garfield	HLR	lunar midnight	2	0
2013-09-11	326 Cleveland	HLR	lunar midnight	2	4
2013-09-11	2050 S. Broad	HLR	lunar midnight	2	4
2013-09-11	1407 Williams	HLR	lunar midnight	2	1
2013-09-11	204 Grand	HLR	lunar midnight	2	1
2013-09-11	20 Grand	HLR	lunar midnight	2	1
2013-09-11	626 Parkinson	HLR	lunar midnight	2	3
2013-09-11	423 Walnut	HLR	lunar midnight	2	1
2013-09-11	35 Garfield	HLR	lunar midnight	2	5
2013-09-11	307 Cuyler	HLR	lunar midnight	2	1
2013-09-11	310 Garfield	HLR	lunar midnight	2	0
2013-09-11	326 Cleveland	HLR	lunar midnight	2	2
2013-09-19	1407 Williams	HLR	lunar midnight	2	0
2013-09-19	626 Parkinson	HLR	lunar midnight	2	0
2013-09-19	423 Walnut	HLR	lunar midnight	2	0
2013-09-19	35 Garfield	HLR	lunar midnight	2	0
2013-09-19	307 Cuyler	HLR	lunar midnight	2	0
2013-09-19	310 Garfield	HLR	lunar midnight	2	0
2013-09-19	326 Cleveland	HLR	lunar midnight	2	0
2013-09-19	1407 Williams	HLR	lunar midnight	2	0
2013-09-19	626 Parkinson	HLR	lunar midnight	2	0
2013-09-19	423 Walnut	HLR	lunar midnight	2	0
2013-09-19	35 Garfield	HLR	lunar midnight	2	0
2013-09-19	307 Cuyler	HLR	lunar midnight	2	0
2013-09-19	310 Garfield	HLR	lunar midnight	2	0
2013-09-19	326 Cleveland	HLR	lunar midnight	2	1
2013-09-26	2050 S. Broad	HLR	lunar midnight	2	0
2013-09-26	1407 Williams	HLR	lunar midnight	2	0
2013-09-26	204 Grand	HLR	lunar midnight	2	0
2013-09-26	20 Grand	HLR	lunar midnight	2	0
2013-09-26	626 Parkinson	HLR	lunar midnight	2	0
2013-09-26	423 Walnut	HLR	lunar midnight	2	0
2013-09-26	35 Garfield	HLR	lunar midnight	2	0
2013-09-26	307 Cuyler	HLR	lunar midnight	2	0
2013-09-26	310 Garfield	HLR	lunar midnight	2	0
2013-09-26	326 Cleveland	HLR	lunar midnight	2	0
2013-09-26	2050 S. Broad	HLR	lunar midnight	2	0
2013-09-26	1407 Williams	HLR	lunar midnight	2	0
2013-09-26	204 Grand	HLR	lunar midnight	2	0
2013-09-26	20 Grand	HLR	lunar midnight	2	0
2013-09-26	626 Parkinson	HLR	lunar midnight	2	0
2013-09-26	423 Walnut	HLR	lunar midnight	2	0
2013-09-26	35 Garfield	HLR	lunar midnight	2	0
2013-09-26	307 Cuyler	HLR	lunar midnight	2	0
2013-09-26	310 Garfield	HLR	lunar midnight	2	0
2013-09-26	326 Cleveland	HLR	lunar midnight	2	0
2013-10-03	2050 S. Broad	HLR	lunar midnight	2	0
2013-10-03	1407 Williams	HLR	lunar midnight	2	0
2013-10-03	204 Grand	HLR	lunar midnight	2	0
2013-10-03	20 Grand	HLR	lunar midnight	2	0
2013-10-03	626 Parkinson	HLR	lunar midnight	2	0
2013-10-03	423 Walnut	HLR	lunar midnight	2	0
2013-10-03	35 Garfield	HLR	lunar midnight	2	0
2013-10-03	307 Cuyler	HLR	lunar midnight	2	0
2013-10-03	310 Garfield	HLR	lunar midnight	2	0
2013-10-03	326 Cleveland	HLR	lunar midnight	2	0
2013-10-03	2050 S. Broad	HLR	lunar midnight	2	0
2013-10-03	1407 Williams	HLR	lunar midnight	2	0
2013-10-03	204 Grand	HLR	lunar midnight	2	0
2013-10-03	20 Grand	HLR	lunar midnight	2	0
2013-10-03	626 Parkinson	HLR	lunar midnight	2	0
2013-10-03	423 Walnut	HLR	lunar midnight	2	0
2013-10-03	35 Garfield	HLR	lunar midnight	2	0
2013-10-03	307 Cuyler	HLR	lunar midnight	2	0
2013-10-03	310 Garfield	HLR	lunar midnight	2	0
2013-10-03	326 Cleveland	HLR	lunar midnight	2	0
2013-08-08	2050 S. Broad	HLR	lunar midnight	1	3
2013-08-08	1407 Williams	HLR	lunar midnight	1	0
2013-08-08	204 Grand	HLR	lunar midnight	1	0
2013-08-08	20 Grand	HLR	lunar midnight	1	0
2013-08-08	626 Parkinson	HLR	lunar midnight	1	0
2013-08-08	423 Walnut	HLR	lunar midnight	1	0
2013-08-08	35 Garfield	HLR	lunar midnight	1	0
2013-08-08	307 Cuyler	HLR	lunar midnight	1	2
2013-08-08	310 Garfield	HLR	lunar midnight	1	1
2013-08-08	326 Cleveland	HLR	lunar midnight	1	1
2013-08-08	2050 S. Broad	HLR	lunar midnight	1	0
2013-08-08	1407 Williams	HLR	lunar midnight	1	1
2013-08-08	204 Grand	HLR	lunar midnight	1	0
2013-08-08	20 Grand	HLR	lunar midnight	1	2
2013-08-08	626 Parkinson	HLR	lunar midnight	1	1
2013-08-08	423 Walnut	HLR	lunar midnight	1	0
2013-08-08	35 Garfield	HLR	lunar midnight	1	2
2013-08-08	307 Cuyler	HLR	lunar midnight	1	1
2013-08-08	310 Garfield	HLR	lunar midnight	1	2
2013-08-08	326 Cleveland	HLR	lunar midnight	1	1
2013-08-15	2050 S. Broad	HLR	lunar midnight	1	0
2013-08-15	1407 Williams	HLR	lunar midnight	1	0
2013-08-15	204 Grand	HLR	lunar midnight	1	0
2013-08-15	20 Grand	HLR	lunar midnight	1	0
2013-08-15	626 Parkinson	HLR	lunar midnight	1	0
2013-08-15	423 Walnut	HLR	lunar midnight	1	0
2013-08-15	35 Garfield	HLR	lunar midnight	1	0
2013-08-15	307 Cuyler	HLR	lunar midnight	1	0
2013-08-15	310 Garfield	HLR	lunar midnight	1	0
2013-08-15	326 Cleveland	HLR	lunar midnight	1	0
2013-08-15	2050 S. Broad	HLR	lunar midnight	1	0
2013-08-15	1407 Williams	HLR	lunar midnight	1	0
2013-08-15	204 Grand	HLR	lunar midnight	1	0
2013-08-15	20 Grand	HLR	lunar midnight	1	0
2013-08-15	626 Parkinson	HLR	lunar midnight	1	0
2013-08-15	423 Walnut	HLR	lunar midnight	1	0
2013-08-15	35 Garfield	HLR	lunar midnight	1	0
2013-08-15	307 Cuyler	HLR	lunar midnight	1	0
2013-08-15	310 Garfield	HLR	lunar midnight	1	0
2013-08-15	326 Cleveland	HLR	lunar midnight	1	0
2013-08-21	2050 S. Broad	HLR	lunar midnight	1	0
2013-08-21	1407 Williams	HLR	lunar midnight	1	3
2013-08-21	204 Grand	HLR	lunar midnight	1	0
2013-08-21	20 Grand	HLR	lunar midnight	1	2
2013-08-21	626 Parkinson	HLR	lunar midnight	1	1
2013-08-21	423 Walnut	HLR	lunar midnight	1	0
2013-08-21	35 Garfield	HLR	lunar midnight	1	0
2013-08-21	307 Cuyler	HLR	lunar midnight	1	2
2013-08-21	310 Garfield	HLR	lunar midnight	1	0
2013-08-21	326 Cleveland	HLR	lunar midnight	1	0
2013-08-21	2050 S. Broad	HLR	lunar midnight	1	0
2013-08-21	1407 Williams	HLR	lunar midnight	1	1
2013-08-21	204 Grand	HLR	lunar midnight	1	0
2013-08-21	20 Grand	HLR	lunar midnight	1	0
2013-08-21	626 Parkinson	HLR	lunar midnight	1	0
2013-08-21	423 Walnut	HLR	lunar midnight	1	2
2013-08-21	35 Garfield	HLR	lunar midnight	1	0
2013-08-21	307 Cuyler	HLR	lunar midnight	1	0
2013-08-21	310 Garfield	HLR	lunar midnight	1	0
2013-08-21	326 Cleveland	HLR	lunar midnight	1	0
2013-08-29	2050 S. Broad	HLR	lunar midnight	1	1
2013-08-29	1407 Williams	HLR	lunar midnight	1	1
2013-08-29	204 Grand	HLR	lunar midnight	1	0
2013-08-29	20 Grand	HLR	lunar midnight	1	0
2013-08-29	626 Parkinson	HLR	lunar midnight	1	0
2013-08-29	423 Walnut	HLR	lunar midnight	1	1
2013-08-29	35 Garfield	HLR	lunar midnight	1	1
2013-08-29	307 Cuyler	HLR	lunar midnight	1	0
2013-08-29	310 Garfield	HLR	lunar midnight	1	1
2013-08-29	326 Cleveland	HLR	lunar midnight	1	1
2013-08-29	2050 S. Broad	HLR	lunar midnight	1	1
2013-08-29	1407 Williams	HLR	lunar midnight	1	0
2013-08-29	204 Grand	HLR	lunar midnight	1	0
2013-08-29	20 Grand	HLR	lunar midnight	1	0
2013-08-29	626 Parkinson	HLR	lunar midnight	1	0
2013-08-29	423 Walnut	HLR	lunar midnight	1	0
2013-08-29	35 Garfield	HLR	lunar midnight	1	0
2013-08-29	307 Cuyler	HLR	lunar midnight	1	1
2013-08-29	310 Garfield	HLR	lunar midnight	1	3
2013-08-29	326 Cleveland	HLR	lunar midnight	1	0

## Sheet: New Jersey BGS
Site name	Date	#	Trap Status	Ae. albopictus (F)	Ae. albopictus (M)	Total
S. Olden	2013-08-08	1	0	79	20	99
S. Olden	2013-08-08	4	0	5	5	10
S. Olden	2013-08-08	8	0	10	1	11
S. Olden	2013-08-08	12	0	6	7	13
S. Olden	2013-08-08	16	0	1	0	1
S. Clinton	2013-08-08	34	0	7	1	8
S. Clinton	2013-08-08	37	0	26	19	45
S. Clinton	2013-08-08	39	0	1	0	1
S. Clinton	2013-08-08	43	0	2	1	3
S. Clinton	2013-08-08	49	0	4	0	4
S. Olden	2013-08-15	1	0	6	21	27
S. Olden	2013-08-15	4	0	4	5	9
S. Olden	2013-08-15	8	0	2	0	2
S. Olden	2013-08-15	12	0	2	0	2
S. Olden	2013-08-15	16	0	8	2	10
S. Clinton	2013-08-15	34	0	7	0	7
S. Clinton	2013-08-15	37	0	1	1	2
S. Clinton	2013-08-15	39	0	2	4	6
S. Clinton	2013-08-15	43	0	2	1	3
S. Clinton	2013-08-15	49	0	2	3	5
S. Olden	2013-08-22	1	0	6	0	6
S. Olden	2013-08-22	4	0	1	0	1
S. Olden	2013-08-22	8	0	0	0	0
S. Olden	2013-08-22	12	0	0	2	2
S. Olden	2013-08-22	16	0	4	1	5
S. Clinton	2013-08-22	34	0	1	0	1
S. Clinton	2013-08-22	37	0	15	32	47
S. Clinton	2013-08-22	39	0	2	0	2
S. Clinton	2013-08-22	43	0	1	3	4
S. Clinton	2013-08-22	49	0	0	0	0
S. Olden	2013-08-29	1	0	0	7	7
S. Olden	2013-08-29	4	0	9	9	18
S. Olden	2013-08-29	8	0	11	7	18
S. Olden	2013-08-29	12	0	5	10	15
S. Olden	2013-08-29	16	0	0	3	3
S. Clinton	2013-08-29	34	0	2	0	2
S. Clinton	2013-08-29	37	0	0	0	0
S. Clinton	2013-08-29	39	0	0	2	2
S. Clinton	2013-08-29	43	0	0	3	3
S. Clinton	2013-08-29	49	0	10	3	13
S. Olden	2013-09-05	1	0	15	14	29
S. Olden	2013-09-05	4	0	1	1	2
S. Olden	2013-09-05	8	0	3	2	5
S. Olden	2013-09-05	12	0	10	4	14
S. Olden	2013-09-05	16	0	3	4	7
S. Clinton	2013-09-05	34	0	3	1	4
S. Clinton	2013-09-05	37	0	0	0	0
S. Clinton	2013-09-05	39	1	N/A	N/A	N/A
S. Clinton	2013-09-05	43	1	N/A	N/A	N/A
S. Clinton	2013-09-05	49	1	N/A	N/A	N/A
S. Olden	2013-09-12	1	0	55	102	157
S. Olden	2013-09-12	4	0	10	37	47
S. Olden	2013-09-12	8	0	10	14	24
S. Olden	2013-09-12	12	0	7	12	19
S. Olden	2013-09-12	16	0	23	29	52
S. Clinton	2013-09-12	34	0	28	9	37
S. Clinton	2013-09-12	37	0	13	5	18
S. Clinton	2013-09-12	39	0	8	2	10
S. Clinton	2013-09-12	43	0	9	0	9
S. Clinton	2013-09-12	49	0	10	2	12
S. Olden	2013-09-19	1	0	19	7	26
S. Olden	2013-09-19	4	1	N/A	N/A	N/A
S. Olden	2013-09-19	8	0	4	0	4
S. Olden	2013-09-19	12	0	0	1	1
S. Olden	2013-09-19	16	0	15	6	21
S. Clinton	2013-09-19	34	0	10	5	15
S. Clinton	2013-09-19	37	0	8	8	16
S. Clinton	2013-09-19	39	0	0	0	0
S. Clinton	2013-09-19	43	0	2	0	2
S. Clinton	2013-09-19	49	0	1	0	1
S. Olden	2013-09-26	1	0	6	1	7
S. Olden	2013-09-26	4	0	2	10	12
S. Olden	2013-09-26	8	0	3	2	5
S. Olden	2013-09-26	12	0	3	3	6
S. Olden	2013-09-26	16	0	5	0	5
S. Clinton	2013-09-26	34	0	9	3	12
S. Clinton	2013-09-26	37	0	1	2	3
S. Clinton	2013-09-26	39	0	10	3	13
S. Clinton	2013-09-26	43	0	1	0	1
S. Clinton	2013-09-26	49	0	2	1	3
S. Olden	2013-10-03	1	0	1	3	4
S. Olden	2013-10-03	4	0	2	1	3
S. Olden	2013-10-03	8	0	2	0	2
S. Olden	2013-10-03	12	0	1	2	3
S. Olden	2013-10-03	16	0	12	1	13
S. Clinton	2013-10-03	34	0	7	3	10
S. Clinton	2013-10-03	37	0	6	3	9
S. Clinton	2013-10-03	39	0	1	0	1
S. Clinton	2013-10-03	43	0	0	0	0
S. Clinton	2013-10-03	49	0	0	0	0
S. Olden	2013-10-10	1	0	0	0	0
S. Olden	2013-10-10	4	0	0	0	0
S. Olden	2013-10-10	8	0	0	0	0
S. Olden	2013-10-10	12	0	2	0	2
S. Olden	2013-10-10	16	0	0	0	0
S. Clinton	2013-10-10	34	0	0	0	0
S. Clinton	2013-10-10	37	0	0	0	0
S. Clinton	2013-10-10	39	0	0	0	0
S. Clinton	2013-10-10	43	0	0	0	0
S. Clinton	2013-10-10	49	0	0	0	0
S. Olden	2013-10-17	1	0	5	3	8
S. Olden	2013-10-17	4	0	0	0	0
S. Olden	2013-10-17	8	0	28	6	34
S. Olden	2013-10-17	12	0	14	1	15
S. Olden	2013-10-17	16	0	5	1	6
S. Clinton	2013-10-17	34	0	18	0	18
S. Clinton	2013-10-17	37	0	0	0	0
S. Clinton	2013-10-17	39	0	0	0	0
S. Clinton	2013-10-17	43	0	5	2	7
S. Clinton	2013-10-17	49	0	5	0	5
S. Olden	2013-10-23	1	1	N/A	N/A	N/A
S. Olden	2013-10-23	4	0	2	0	2
S. Olden	2013-10-23	8	0	1	5	6
S. Olden	2013-10-23	12	0	0	0	0
S. Olden	2013-10-23	16	0	1	0	1
S. Clinton	2013-10-23	34	0	2	0	2
S. Clinton	2013-10-23	37	0	0	0	0
S. Clinton	2013-10-23	39	0	0	0	0
S. Clinton	2013-10-23	43	0	1	0	1
S. Clinton	2013-10-23	49	0	0	0	0

## Sheet: FLorida Landing rate
EPI Week	Date	Time	Time Interval	Asset #	House	MC Zone	Totals
29	2013-07-16	12:30:00	Solar noon	TRAP_0341	1	NSB 37	3
29	2013-07-16	13:22:00	Solar noon	TRAP_0346	3	NSB 37	3
29	2013-07-16	13:00:00	Solar noon	TRAP_0345	2	NSB 37	0
29	2013-07-16	14:00:00	Solar noon	TRAP_0352	5	NSB 37A	0
29	2013-07-16	13:38:00	Solar noon	TRAP_0348	4	NSB 37A	3
29	2013-07-16	20:20:00	Sunset	TRAP_0341	1	NSB 37	0
29	2013-07-16	20:49	Sunset	TRAP_0346	3	NSB 37	0
29	2013-07-16	21:29:00	Sunset	TRAP_0352	5	NSB 37A	0
29	2013-07-16	21:05:00	Sunset	TRAP_0348	4	NSB 37A	7
29	2013-07-16	20:25:00	Sunset	TRAP_0354	6	NSB 37A	0
29	2013-07-17	00:30:00	Linar midnight	TRAP_0341	1	NSB 37	0
29	2013-07-17	00:54:00	Linar midnight	TRAP_0346	3	NSB 37	0
29	2013-07-17	00:43:00	Linar midnight	TRAP_0345	2	NSB 37	0
29	2013-07-17	01:28:00	Linar midnight	TRAP_0352	5	NSB 37A	1
29	2013-07-17	01:08:00	Linar midnight	TRAP_0348	4	NSB 37A	0
29	2013-07-17	01:43:00	Linar midnight	TRAP_0354	6	NSB 37A	0
29	2013-07-17	06:36:00	Sunrise	TRAP_0341	1	NSB 37	8
29	2013-07-17	06:54:00	Sunrise	TRAP_0346	3	NSB 37	5
29	2013-07-17	06:45:00	Sunrise	TRAP_0345	2	NSB 37	0
29	2013-07-17	07:23:00	Sunrise	TRAP_0352	5	NSB 37A	0
29	2013-07-17	07:07:00	Sunrise	TRAP_0348	4	NSB 37A	0
29	2013-07-17	07:53:00	Sunrise	TRAP_0354	6	NSB 37A	0
30	2013-07-22	12:27:00	Solar noon	TRAP_0341	1	NSB 37	5
30	2013-07-22	13:00:00	Solar noon	TRAP_0346	3	NSB 37	1
30	2013-07-22	12:47:00	Solar noon	TRAP_0345	2	NSB 37	0
30	2013-07-22	14:22:00	Solar noon	TRAP_0352	5	NSB 37A	0
30	2013-07-22	13:21:00	Solar noon	TRAP_0348	4	NSB 37A	0
30	2013-07-22	20:12:00	Sunset	TRAP_0341	1	NSB 37	0
30	2013-07-22	20:41:00	Sunset	TRAP_0346	3	NSB 37	0
30	2013-07-22	20:29:00	Sunset	TRAP_0345	2	NSB 37	0
30	2013-07-22	21:43:00	Sunset	TRAP_0352	5	NSB 37A	0
30	2013-07-22	20:52:00	Sunset	TRAP_0348	4	NSB 37A	0
30	2013-07-22	21:57:00	Sunset	TRAP_0354	6	NSB 37A	0
30	2013-07-23	00:26:00	Linar midnight	TRAP_0341	1	NSB 37	4
30	2013-07-23	00:47:00	Linar midnight	TRAP_0346	3	NSB 37	0
30	2013-07-23	00:38:00	Linar midnight	TRAP_0345	2	NSB 37	0
30	2013-07-23	01:14:00	Linar midnight	TRAP_0352	5	NSB 37A	0
30	2013-07-23	01:00:00	Linar midnight	TRAP_0348	4	NSB 37A	0
30	2013-07-23	01:30:00	Linar midnight	TRAP_0354	6	NSB 37A	0
30	2013-07-23	06:23:00	Sunrise	TRAP_0341	1	NSB 37	1
30	2013-07-23	07:04:00	Sunrise	TRAP_0346	3	NSB 37	3
30	2013-07-23	06:38:00	Sunrise	TRAP_0345	2	NSB 37	0
30	2013-07-23	07:49:00	Sunrise	TRAP_0352	5	NSB 37A	0
30	2013-07-23	07:20:00	Sunrise	TRAP_0348	4	NSB 37A	2
30	2013-07-23	08:04:00	Sunrise	TRAP_0354	6	NSB 37A	1
31	2013-07-30	12:30:00	Solar noon	TRAP_0341	1	NSB 37	7
31	2013-07-30	12:55:00	Solar noon	TRAP_0346	3	NSB 37	0
31	2013-07-30	12:41:00	Solar noon	TRAP_0345	2	NSB 37	3
31	2013-07-30	13:26:00	Solar noon	TRAP_0352	5	NSB 37A	0
31	2013-07-30	13:13:00	Solar noon	TRAP_0348	4	NSB 37A	2
31	2013-07-30	13:43:00	Solar noon	TRAP_0354	6	NSB 37A	0
31	2013-07-30	20:17:00	Sunset	TRAP_0341	1	NSB 37	2
31	2013-07-30	20:42:00	Sunset	TRAP_0346	3	NSB 37	2
31	2013-07-30	20:29:00	Sunset	TRAP_0345	2	NSB 37	0
31	2013-07-30	17:25:00	Sunset	TRAP_0352	5	NSB 37A	0
31	2013-07-30	20:54:00	Sunset	TRAP_0348	4	NSB 37A	0
31	2013-07-30	17:48:00	Sunset	TRAP_0354	6	NSB 37A	1
31	2013-07-31	12:30:00	Linar midnight	TRAP_0341	1	NSB 37	2
31	2013-07-31	01:09:00	Linar midnight	TRAP_0346	3	NSB 37	0
31	2013-07-31	00:58:00	Linar midnight	TRAP_0345	2	NSB 37	0
31	2013-07-31	01:37:00	Linar midnight	TRAP_0352	5	NSB 37A	0
31	2013-07-31	01:23:00	Linar midnight	TRAP_0348	4	NSB 37A	0
31	2013-07-31	01:49:00	Linar midnight	TRAP_0354	6	NSB 37A	0
31	2013-07-31	06:44:00	Sunrise	TRAP_0341	1	NSB 37	5
31	2013-07-31	07:25:00	Sunrise	TRAP_0346	3	NSB 37	1
31	2013-07-31	07:14:00	Sunrise	TRAP_0345	2	NSB 37	0
31	2013-07-31	07:52:00	Sunrise	TRAP_0352	5	NSB 37A	0
31	2013-07-31	07:36:00	Sunrise	TRAP_0348	4	NSB 37A	1
31	2013-07-31	08:03:00	Sunrise	TRAP_0354	6	NSB 37A	0
32	2013-08-05	12:29:00	Solar noon	TRAP_0341	1	NSB 37	2
32	2013-08-05	20:13:00	Sunset	TRAP_0341	1	NSB 37	6
32	2013-08-05	20:41:00	Sunset	TRAP_0346	3	NSB 37	0
32	2013-08-05	20:29:00	Sunset	TRAP_0345	2	NSB 37	3
32	2013-08-05	21:36:00	Sunset	TRAP_0352	5	NSB 37A	0
32	2013-08-05	21:02:00	Sunset	TRAP_0348	4	NSB 37A	0
32	2013-08-06	00:29:00	Linar midnight	TRAP_0341	1	NSB 37	4
32	2013-08-06	00:52:00	Linar midnight	TRAP_0346	3	NSB 37	0
32	2013-08-06	00:41:00	Linar midnight	TRAP_0345	2	NSB 37	0
32	2013-08-06	01:35:00	Linar midnight	TRAP_0352	5	NSB 37A	0
32	2013-08-06	01:22:00	Linar midnight	TRAP_0348	4	NSB 37A	0
32	2013-08-06	01:49:00	Linar midnight	TRAP_0354	6	NSB 37A	0
32	2013-08-06	06:47:00	Sunrise	TRAP_0341	1	NSB 37	4
32	2013-08-06	07:22:00	Sunrise	TRAP_0346	3	NSB 37	2
32	2013-08-06	07:02:00	Sunrise	TRAP_0345	2	NSB 37	4
32	2013-08-06	07:44:00	Sunrise	TRAP_0352	5	NSB 37A	0
32	2013-08-06	07:32:00	Sunrise	TRAP_0348	4	NSB 37A	1
32	2013-08-06	07:55:00	Sunrise	TRAP_0354	6	NSB 37A	0
33	2013-08-12	12:28:00	Solar noon	TRAP_0341	1	NSB 37	4
33	2013-08-12	13:00:00	Solar noon	TRAP_0346	3	NSB 37	0
33	2013-08-12	12:46:00	Solar noon	TRAP_0345	2	NSB 37	1
33	2013-08-12	14:09:00	Solar noon	TRAP_0352	5	NSB 37A	0
33	2013-08-12	13:53:00	Solar noon	TRAP_0348	4	NSB 37A	0
33	2013-08-12	14:23:00	Solar noon	TRAP_0354	6	NSB 37A	1
33	2013-08-12	20:07:00	Sunset	TRAP_0341	1	NSB 37	0
33	2013-08-12	20:32:00	Sunset	TRAP_0346	3	NSB 37	0
33	2013-08-12	20:23:00	Sunset	TRAP_0345	2	NSB 37	0
33	2013-08-12	21:15:00	Sunset	TRAP_0352	5	NSB 37A	0
33	2013-08-12	21:29:00	Sunset	TRAP_0348	4	NSB 37A	0
33	2013-08-12	21:28:00	Sunset	TRAP_0354	6	NSB 37A	0
33	2013-08-13	00:28:00	Linar midnight	TRAP_0341	1	NSB 37	0
33	2013-08-13	01:32:00	Linar midnight	TRAP_0346	3	NSB 37	0
33	2013-08-13	01:20:00	Linar midnight	TRAP_0345	2	NSB 37	0
33	2013-08-13	01:58:00	Linar midnight	TRAP_0352	5	NSB 37A	0
33	2013-08-13	01:45:00	Linar midnight	TRAP_0348	4	NSB 37A	0
33	2013-08-13	02:10:00	Linar midnight	TRAP_0354	6	NSB 37A	0
33	2013-08-13	06:51:00	Sunrise	TRAP_0341	1	NSB 37	1
33	2013-08-13	07:40:00	Sunrise	TRAP_0346	3	NSB 37	0
33	2013-08-13	07:24:00	Sunrise	TRAP_0345	2	NSB 37	1
33	2013-08-13	08:10:00	Sunrise	TRAP_0352	5	NSB 37A	1
33	2013-08-13	07:53:00	Sunrise	TRAP_0348	4	NSB 37A	0
33	2013-08-13	08:20:00	Sunrise	TRAP_0354	6	NSB 37A	0
34	2013-08-20	12:24:00	Solar noon	TRAP_0341	1	NSB 37	2
34	2013-08-20	12:46:00	Solar noon	TRAP_0346	3	NSB 37	0
34	2013-08-20	12:35:00	Solar noon	TRAP_0345	2	NSB 37	0
34	2013-08-20	13:14:00	Solar noon	TRAP_0352	5	NSB 37A	0
34	2013-08-20	13:00:00	Solar noon	TRAP_0348	4	NSB 37A	0
34	2013-08-20	13:25:00	Solar noon	TRAP_0354	6	NSB 37A	0
34	2013-08-20	19:59:00	Sunset	TRAP_0341	1	NSB 37	5
34	2013-08-20	20:35:00	Sunset	TRAP_0346	3	NSB 37	2
34	2013-08-20	20:19:00	Sunset	TRAP_0345	2	NSB 37	1
34	2013-08-20	21:06:00	Sunset	TRAP_0352	5	NSB 37A	0
34	2013-08-20	20:48:00	Sunset	TRAP_0348	4	NSB 37A	0
34	2013-08-20	21:16:00	Sunset	TRAP_0354	6	NSB 37A	0
34	2013-08-21	00:24:00	Linar midnight	TRAP_0341	1	NSB 37	1
34	2013-08-21	01:44:00	Linar midnight	TRAP_0346	3	NSB 37	0
34	2013-08-21	00:24:00	Linar midnight	TRAP_0345	2	NSB 37	0
34	2013-08-21	01:21:00	Linar midnight	TRAP_0352	5	NSB 37A	0
34	2013-08-21	01:10:00	Linar midnight	TRAP_0348	4	NSB 37A	0
34	2013-08-21	01:32:00	Linar midnight	TRAP_0354	6	NSB 37A	0
35	2013-08-26	12:25:00	Solar noon	TRAP_0341	1	NSB 37	4
35	2013-08-26	13:33:00	Solar noon	TRAP_0346	3	NSB 37	0
35	2013-08-26	13:00:00	Solar noon	TRAP_0345	2	NSB 37	2
35	2013-08-26	13:50:00	Solar noon	TRAP_0352	5	NSB 37A	0
35	2013-08-26	13:33:00	Solar noon	TRAP_0348	4	NSB 37A	5
35	2013-08-26	14:06:00	Solar noon	TRAP_0354	6	NSB 37A	0
35	2013-08-26	19:53:00	Sunset	TRAP_0341	1	NSB 37	3
35	2013-08-26	20:29:00	Sunset	TRAP_0346	3	NSB 37	0
35	2013-08-26	20:15:00	Sunset	TRAP_0345	2	NSB 37	0
35	2013-08-26	21:23:00	Sunset	TRAP_0352	5	NSB 37A	0
35	2013-08-26	21:34:00	Sunset	TRAP_0354	6	NSB 37A	0
35	2013-08-27	00:25:00	Linar midnight	TRAP_0341	1	NSB 37	10
35	2013-08-27	01:34:00	Linar midnight	TRAP_0346	3	NSB 37	1
35	2013-08-27	00:43:00	Linar midnight	TRAP_0345	2	NSB 37	0
35	2013-08-27	01:34:00	Linar midnight	TRAP_0348	4	NSB 37A	0
35	2013-08-27	06:59:00	Sunrise	TRAP_0341	1	NSB 37	4
35	2013-08-27	08:38:00	Sunrise	TRAP_0346	3	NSB 37	1
35	2013-08-27	08:27:00	Sunrise	TRAP_0345	2	NSB 37	1
35	2013-08-27	07:24:00	Sunrise	TRAP_0352	5	NSB 37A	0
35	2013-08-27	07:47:00	Sunrise	TRAP_0348	4	NSB 37A	2
35	2013-08-27	07:24:00	Sunrise	TRAP_0354	6	NSB 37A	0
36	2013-09-03	12:22:00	Solar noon	TRAP_0341	1	NSB 37	0
36	2013-09-03	12:50:00	Solar noon	TRAP_0346	3	NSB 37	0
36	2013-09-03	12:35:00	Solar noon	TRAP_0345	2	NSB 37	4
36	2013-09-03	13:21:00	Solar noon	TRAP_0352	5	NSB 37A	0
36	2013-09-03	13:01:00	Solar noon	TRAP_0348	4	NSB 37A	1
36	2013-09-03	13:38:00	Solar noon	TRAP_0354	6	NSB 37A	0
36	2013-09-03	19:44:00	Sunset	TRAP_0341	1	NSB 37	2
36	2013-09-03	20:15:00	Sunset	TRAP_0346	3	NSB 37	1
36	2013-09-03	20:00:00	Sunset	TRAP_0345	2	NSB 37	0
36	2013-09-03	21:12:00	Sunset	TRAP_0352	5	NSB 37A	0
36	2013-09-03	20:34:00	Sunset	TRAP_0348	4	NSB 37A	0
36	2013-09-03	21:25:00	Sunset	TRAP_0354	6	NSB 37A	0
36	2013-09-04	00:22:00	Linar midnight	TRAP_0341	1	NSB 37	0
36	2013-09-04	01:23:00	Linar midnight	TRAP_0346	3	NSB 37	0
36	2013-09-04	00:55:00	Linar midnight	TRAP_0345	2	NSB 37	0
36	2013-09-04	01:40:00	Linar midnight	TRAP_0352	5	NSB 37A	0
36	2013-09-04	02:00:00	Linar midnight	TRAP_0348	4	NSB 37A	0
36	2013-09-04	01:50:00	Linar midnight	TRAP_0354	6	NSB 37A	0
36	2013-09-04	07:03:00	Sunrise	TRAP_0341	1	NSB 37	4
36	2013-09-04	07:57:00	Sunrise	TRAP_0346	3	NSB 37	0
36	2013-09-04	07:36:00	Sunrise	TRAP_0345	2	NSB 37	2
36	2013-09-04	08:20:00	Sunrise	TRAP_0352	5	NSB 37A	0
36	2013-09-04	08:08:00	Sunrise	TRAP_0348	4	NSB 37A	0
36	2013-09-04	08:40:00	Sunrise	TRAP_0354	6	NSB 37A	0
37	2013-09-09	19:37:00	Sunset	TRAP_0341	1	NSB 37	7
37	2013-09-09	20:07:00	Sunset	TRAP_0346	3	NSB 37	1
37	2013-09-09	19:52:00	Sunset	TRAP_0345	2	NSB 37	0
37	2013-09-09	20:40:00	Sunset	TRAP_0352	5	NSB 37A	0
37	2013-09-09	20:21:00	Sunset	TRAP_0348	4	NSB 37A	0
37	2013-09-09	20:50:00	Sunset	TRAP_0354	6	NSB 37A	1
37	2013-09-10	00:20:00	Linar midnight	TRAP_0341	1	NSB 37	2
37	2013-09-10	01:10:00	Linar midnight	TRAP_0346	3	NSB 37	2
37	2013-09-10	00:36:00	Linar midnight	TRAP_0345	2	NSB 37	3
37	2013-09-10	01:41:00	Linar midnight	TRAP_0352	5	NSB 37A	0
37	2013-09-10	01:26:00	Linar midnight	TRAP_0348	4	NSB 37A	1
37	2013-09-10	01:50:00	Linar midnight	TRAP_0354	6	NSB 37A	0
37	2013-09-10	07:06:00	Sunrise	TRAP_0341	1	NSB 37	10
37	2013-09-10	07:52:00	Sunrise	TRAP_0346	3	NSB 37	2
37	2013-09-10	07:38:00	Sunrise	TRAP_0345	2	NSB 37	0
37	2013-09-10	08:25:00	Sunrise	TRAP_0352	5	NSB 37A	0
37	2013-09-10	08:10:00	Sunrise	TRAP_0348	4	NSB 37A	1
37	2013-09-10	08:43:00	Sunrise	TRAP_0354	6	NSB 37A	0
37	9/9/20013	12:50:00	Solar noon	TRAP_0346	3	NSB 37	0
37	9/9/20013	12:35:00	Solar noon	TRAP_0345	2	NSB 37	1
37	9/9/20013	13:20:00	Solar noon	TRAP_0352	5	NSB 37A	0
37	9/9/20013	13:05:00	Solar noon	TRAP_0348	4	NSB 37A	1
37	9/9/20013	13:35:00	Solar noon	TRAP_0354	6	NSB 37A	0
37	9/9/20013	12:20:00	Sunset	TRAP_0341	1	NSB 37	4

## Sheet: Florida BGS
Date	Total # of mosquitoes
2013-07-16	119
2013-07-22	86
2013-07-30	161
2013-08-05	44
2013-08-12	121
2013-08-20	66
2013-08-26	44
2013-09-03	52
